# Supplementary material for: Association of the long fluoroscopy time with factors in contemporary primary percutaneous coronary interventions
Source: PLoS One. 2020 Aug 10;15(8):e0237362. doi: 10.1371/journal.pone.0237362 (PMC7416924; doi:10.1371/journal.pone.0237362)
Supplement: S1 File — (XLSX) [file pone.0237362.s001.xlsx]

## Sheet: Sheet1
No.	age	Male=1,Female=0	fluoroscopy-time	quintile	Q1-4=0、Q5=1	Height(cm)	Body weight(kg)	SBP at admission	DBP at admission	HR at admission	HTN defined as SBP>140 or DBP>90 or medication_at admission	DM defiend as HbA1c>6.5% or medication_at admission	Dyslipidemia defined as Tcho≥220 or LDL≥140 or medication_at admission	CRF on HD_at admission	Previous PCI	Previous CABG	Previsou MI	Current smoker	Aspirin	Thienopyridine	Statin	ACE-inhibitor, ARB	Beta-blocker	Calcium channel blocker	Diuretic	Hypoglycemic agents	Insulin	Creatinine(mg/dl)	eGFR(ml/min/1.73m2)	Hemoglobin(g/dl)	BNP(pg/ml)	Onset to hospitalization time( 0-24 hours=0, Longer than 24 hours=1)	Killip class (1or 2, 3, 4) 1or2=1, 3=2, 4=3	Killip class (1or 2, 3, 4) 1or2=0, 3or4=1	Cardiac arrest at prehospital or ER	Shock vital at prehospital or ER	Culprit lesion (LM-LAD, RCA, LCX, Graft, not determined) LM-LAD=1, RCA=2, LCX=3, Graft=4, not determined=5	Culprit lesion (LM-LAD, RCA, LCX, Graft, not determined) LM-LAD=1, the others=0	Number of diseased vessels (single=1, double=2, triple=3)	Number of diseased vessels (single or double=0, triple=1)	Left main trunk lesion	Left main trunk bifurcation lesion	Ostia lesion	Bifurcation lesion	Initial TIMI flow grade of culprit (0, 1, 2, 3)	Initial TIMI flow grade of culprit ("0"-"2"=0, "3"=1)	lesion length(mm)	reference diameter(mm)	Lesion angle 1.mild 2. moderate 3.severe
1	70	1	6	1	0	165	71	184	121	73	1	1	1	0	0	0	0	0	0	0	0	0	0	0	0	0	0	0.92	62.8	15.9	30.1	0	1	0	0	0	1	1	3	1	0	0	0	0	0	0	18.66	2.23	1
2	86	1	7	1	0	160	58	169	70	73	1	0	0	0	0	0	0	0	1	0	0	0	0	0	0	0	0	1.01	53.4	13	244.2	0	1	0	0	0	1	1	1	0	1	0	1	0	0	0	7.31	2.45	2
3	64	1	8	1	0	167	72	85	57	58	1	0	1	0	1	0	1	1	0	0	0	0	0	0	0	0	0	0.82	73.1	13.9		0	3	1	0	1	3	0	2	0	0	0	0	0	1	0	15.76	2.78	1
4	77	1	8	1	0	157	56.5			60	1	0	0	0	0	0	0	0	0	0	0	0	0	1	0	0	0	1.12	49.3	13.4	48.3	0	3	1	1	1	2	0	2	0	0	0	0	0	0	0	10.61	2.99	2
5	41	1	8	1	0	170	66	167	100	58	0	0	0	0	0	0	0	1	1	1	0	0	1	0	0	0	0	0.9	75	16.1	10.2	0	3	1	1	1	1	1	1	0	0	0	0	0	0	0	11.98	2.41	2
6	58	1	8	1	0	168	60	148	108	108	1	1	1	0	0	0	0	1	0	0	1	1	0	1	0	1	0	1.01	59.8	11		0	1	0	0	0	1	1	1	0	0	0	0	0	0	0	15.34	2.4	1
7	70	0	8	1	0	165	56	136	76	78	1	1	0	0	0	0	0	0	0	0	0	0	0	1	0	1	1	0.57	78.3	12.9	21.3	0	1	0	0	1	1	1	1	0	0	0	0	0	0	0	11.25	2.45	2
8	84	1	8	1	0	163	52	139	79	79	1	0	0	0	0	0	0	0	0	0	0	1	0	1	0	0	0	0.92	59.6	11.7	614.1	0	1	0	0	0	1	1	1	0	0	0	0	0	2	0	31.27	2.83	1
9	70	1	9	1	0	169	68	153	74	67	1	0	1	0	0	0	0	0	0	0	0	0	0	0	0	0	0	0.91	63.5	15.2	42.1	0	1	0	0	0	1	1	1	0	0	0	0	0	0	0	10.46	2.27	2
10	71	1	9	1	0	167	59	141	66	75	1	1	1	0	1	0	1	0	0	1	1	0	0	1	0	1	0	0.77	76	13.5	185.1	1	1	0	0	0	3	0	1	0	0	0	0	0	3	1	15.01	2.71	2
11	75	1	9	1	0	170	64	70		30	1	1	1	0	1	0	1	0	1	0	1	1	0	1	0	0	0	1.66	32.3	11.3	10.1	0	3	1	0	1	2	0	2	0	0	0	0	1	0	0	9.06	2.5	2
12	41	1	9	1	0	170	76.2	122	96	86	1	0	1	0	0	0	0	1	0	0	0	0	0	0	0	0	0	0.71	70.7	16.3	4.3	0	1	0	0	0	2	0	1	0	0	0	0	0	0	0	8.6	3.3	1
13	89	1	9	1	0	167	52	129	75	77	0	0	0	0	0	0	0	0	0	0	0	0	0	0	0	0	0	0.68	81.6	12.6	409.2	0	1	0	0	0	1	1	2	0	0	0	0	0	0	0	7.91	2.38	1
14	47	1	9	1	0	170	79	170	96	90	1	1		0	0	0	0	0	0	0	0	0	0	0	0	0	0	0.45	153.9	15.9	102.5	0	1	0	0	0	1	1	1	0	0	0	0	1	3	1	13.01	2.73	1
15	52	1	9	1	0	178	73	120	73	76	0	0	1	0	0	0	0	1	0	0	0	0	0	0	0	0	0	0.7	92.2	14.6		0	1	0	0	0	1	1	1	0	0	0	0	0	0	0	6.9	1.95	1
16	68	1	9	1	0	160	55	191	100	90	1	0	1	0	0	0	0	1	0	0	0	0	0	0	0	0	0	0.8	73.8	14.6	105.4	0	1	0	0	0	1	1	1	0	0	0	0	0	0	0	16.19	1.96	1
17	87	0	9	1	0	151	50	123	73	88	1	0	0	0	0	0	0	0	0	0	0	0	0	0	0	0	0	0.74	55.3	10.8	474.2	0	1	0	0	0	2	0	2	0	0	0	0	0	2	0	11.1	3.91	2
18	43	1	10	1	0	167	78	134	82	78	1	1	1	0	0	0	0	1	0	0	0	0	0	0	0	0	0	1.03	63.8	14.6	34.8	0	1	0	0	0	2	0	1	0	0	0	0	0	1	0	7.35	2.65	1
19	85	0	10	1	0	152	34.7	120	80	80	1	0	0	0	0	0	0	0	0	0	0	1	0	1	0	0	0	0.53	80.2	13	80.3	0	1	0	0	0	1	1	1	0	0	0	0	0	0	0	13.9	1.46	2
20	49	0	10	1	0	155	87	147	86	59	1		1	0	1	0	1	0	1	0	1	1	0	1	0	0	0	0.73	66.2	13.7	148.4	0	1	0	0	0	2	0	2	0	0	0	0	0	0	0	7.32	1.82	1
21	86	0	10	1	0	146	36	166	76	72	1	0	0	0	0	0	0	0	0	0	0	0	0	0	0	0	0	0.56	73.8	11.3	67	0	1	0	0	0	1	1	1	0	0	0	0	0	0	0	13.83	1.94	1
22	47	1	10	1	0	170	82	160	80	108	1	1	0	1	0	0	0	1	0	0	0	0	0	0	1	1	0	11.23	5.6	11.5	353	0	1	0	0	0	1	1	2	0	0	0	0	0	2	0	42.62	1.87	1
23	88	0	10	1	0	150	48	158	82	78	1	0	1	0	0	0	0	0	0	1	0	0	0	0	0	0	0	1.13	34.7	13.2	563.2	0	1	0	0	0	2	0	2	0	0	0	0	0	3	1	9.88	2.44	1
24	83	1	10	1	0	160	50	95	54	94	0	0	0	0	0	0	0	1	0	0	0	0	0	0	0	0	0	0.65	87.4	13.2	55.4	0	1	0	0	0	1	1	2	0	0	0	0	0	0	0	16.5	2.45	2
25	78	1	10	1	0	153	59	133	76	60	1	0	0	0	0	0	0	0	0	0	0	0	0	0	0	0	0	0.98	56.8	14	77.6	0	1	0	0	0	2	0	3	1	0	0	0	0	0	0	12.31	2.9	1
26	70	0	11	1	0	147	42	166	90	102	1	0	0	0	0	0	0	0	0	0	0	1	0	0	1	0	0	0.35	133.6	13.5	43.8	0	1	0	0	0	1	1	2	0	0	0	0	0	2	0	17.48	2.45	3
27	78	1	11	1	0	169	75	110	70	70	1	0	0	0	0	0	0	0	0	0	0	1	0	1	1	0	0	0.83	68.11	13.2	85	0	1	0	0	0	3	0	2	0	0	0	0	1	1	0	22.16	2.3	2
28	62	1	11	1	0	165	76	159	92	60	1	1	1	0	0	0	0	0	0	0	1	1	0	0	0	1	1	0.64	96.7	13.5	8.3	0	1	0	0	0	1	1	1	0	0	0	0	0	0	0	15.15	1.97	1
29	61	1	11	1	0	175	71	110	60	57	0	0	1	0	0	0	0	0	0	0	0	0	0	0	0	0	0	0.86	70.3	14.5	10.1	0	1	0	0	0	1	1	1	0	0	0	0	0	0	0	9.89	2.56	1
30	76	1	11	1	0	160	50	158	92	132	1	1	1	0	0	0	0	1	0	0	0	1	0	1	0	1	0	0.74	77.8	11	160.9	0	1	0	0	0	1	1	2	0	0	0	0	0	2	0	16.31	2.61	2
31	68	0	11	1	0	149.5	54.4	80			0	1	0	0	0	0	0	0										0.57	53.8	11.9	243.6	0	1	0	0	1	2	0	1	0	0	0	0	0	0	0	9.83	2.54	2
32	68	1	11	1	0	165	69	119	76	42	1	0	1	0	0	0	0	1	0	0	0	0	0	1	0	0	0	0.97	59.8	13	12.5	0	1	0	0	0	2	0	1	0	0	0	0	0	0	0	16.4	2.36	2
33	76	1	11	1	0	168	56				1	0	0	0	0	0	0	0	0	0	0	0	0	1	0	0	0	0.7	82.7	11.3	36.6	0	1	0	0		2	0	2	0	0	0	0	0	0	0	13.22	2.63	2
34	86	1	11	1	0	167	64.7	120	60	80			0	0	0	0	0	0										0.77	71.9	13.8	32.3	0	1	0	0	0	2	0	2	0	1	0	0	0	0	0	17.55	1.79	1
35	61	1	11	1	0	161	59	95	42	98	1	0	1	0	1	0	1	0	1	0	1	1	0	0	0	0	0	1	59.6	13.4	6.4	0	1	0	0	0	2	0	1	0	0	0	0	0	0	0	13.59	2.82	2
36	45	1	11	1	0	170	70	113	81	76	0	0	1	0	0	0	0	1	0	0	0	0	0	0	0	0	0	1.11	58	18.3	13.7	0	3	1	1	1	1	1	1	0	0	0	0	1	0	0	14.92	3.62	2
37	78	1	11	1	0	165	60.2	137	88	88		0	0	0	0	0	0	1	0	0	0	0	0	0	0	0	0	0.83	68.1	13.5	37.4	0	3	1	1	1	2	0	2	0	0	0	0	0	1	0	10.46	2.94	2
38	88	1	11	1	0	144	37	97	63	95	0	0	0	0	0	0	0	0	0	0	0	0	0	0	0	0	0	0.53	81.8	13.2	342.7	0	1	0	0	0	2	0	2	0	0	0	0	0	2	0	9.94	3.26	2
39	75	1	11	1	0	154	52.5	139	86	80	0	0	1	0	0	0	0	0	0	0	0	0	0	0	0	0	0	0.72	80.5	14.1	42.2	0	1	0	0	0	1	1	1	0	0	0	0	0	3	1	10.09	2.99	1
40	68	1	12	1	0	150	55	132	82	58	0	0	1	0	0	0	0	1	1	0	0	0	0	0	0	0	0	0.74	74.8	14.9		0	1	0	0	0	2	0	2	0	0	0	0	0	2	0	14.4	2.99	1
41	78	0	12	1	0	155	65	111	35	49	1	0	0	0	0	0	0	0	0	0	0	0	0	0	1	0	0	0.65	65.8	13.9	260.9	0	1	0	0	1	2	0	1	0	0	0	0	0	0	0	18.8	2.41	2
42	79	1	12	1	0	166.6	72.6	102	74	108	1	0	1	0	0	0	0	0	0	0	0	0	0	0	0	0	0	2.15	24	11.3	623.9	0	1	0	0	0	1	1	1	0	0	0	0	0	3	1	10.02	1.79	2
43	73	1	12	1	0	153	58	188	75	56	1	0	0	0	0	0	0	0	0	0	0	0	0	0	0	0	0	0.53	113.4	13.5	65.8	0	1	0	0	0	2	0	2	0	0	0	0	0	0	0	15.84	2.56	1
44	68	1	12	1	0	170	63	97	65	88	1	1	1	0	0	0	0	1	0	0	0	0	0	0	0	0	0	0.76	78	12.7	384	1	1	0	0	0	2	0	3	1	1	0	0	0	1	0	11.36	2.51	1
45	69	0	12	1	0	153	60	169	72	66	1	1	1	0	0	0	0	0	1	0	1	1	1	1	0	1	1	0.57	78.7	14.1	170.8	0	1	0	0	0	2	0	3	1	0	0	0	0	3	1	13.14	2.32	1
46	72	0	12	1	0	162	46.5	100	60	72	0	0	1	0	0	0	0	0	0	0	0	0	0	0	0	0	0	0.48	93.8	13.5	13.2	0	1	0	0	0	2	0	1	0	0	0	0	0	2	0	12.37	3.35	2
47	87	1	12	1	0	160	55	164	70	120	1	1	0	0	0	0	0	0	1	1	0	1	1	1	0	0	0	2.22	22.5	10	2565.5	0	2	1	0	0	1	1	2	0	0	0	0	0	3	1	15.55	2.41	1
48	64	1	12	1	0	159	73	133	105	88	1	0	0	1	0	0	0	1	0	0	0	0	0	0	0	0	0	0.82	73.1	16.5	33.8	0	1	0	0	0	1	1	1	0	0	0	0	1	0	0	20.35	3	2
49	45	1	12	1	0	165	53.5	125	78	88	0	0	0	0	0	0	0	1	0	0	0	0	0	0	0	0	0	0.61	111.7	16.5	6.1	0	1	0	0	0	2	0	2	0	0	0	0	0	0	0	21.68	2.12	2
50	59	1	12	1	0	170	75.4	163	113	85	1	1	1	0	0	0	0	0	0	0	0	0	0	0	0	0	0	1.03	58.3	16.5	186.6	0	1	0	0	0	2	0	2	0	0	0	0	0	0	0	19.21	3.27	2
51	77	1	12	1	0	162	56.5	121	69	70	1	0	0	0	0	0	0	0	0	0	0	0	0	0	0	0	0	1.11	49.8	13.2	70.6	0	1	0	0	0	2	0	3	1	0	0	0	0	0	0	14.28	3.44	3
52	77	1	12	1	0	161	77	176	89	72	1	1	1	0	1	0	1	0	0	1	1	1	1	0	0	0	0	1.22	44.9	13.5	39.8	0	1	0	0	0	2	0	2	0	0	0	0	0	0	0	16.16	3.36	2
53	69	1	13	1	0	175	82.2	128	94	104	1	0	1	0	0	0	0	0	0	0	0	0	0	0	0	0	0	1.08	52.9	15.5	62.1	0	3	1	1	1	1	1	1	0	0	0	0	0	0	0	11.49	2.73	1
54	41	0	13	1	0	168	55	132	80	93	0	0	1	0	0	0	0	0	0	0	0	0	0	0	0	0	0	0.43	124.3	14.2	505.5	0	1	0	0	0	1	1	1	0	0	0	0	0	0	0	9.73	2.05	1
55	78	0	13	1	0	158	46.2	167	98	61	1	0	0	0	0	0	0	0	0	0	0	0	0	0	0	0	0	0.53	82.2	12.3	36.5	0	1	0	0	0	1	1	1	0	0	0	0	0	3	1	12.65	2.22	1
56	52	1	13	1	0	176	78	175	105	75	1	0	1	0	0	0	0	1	0	0	0	1	0	0	0	0	0	0.44	153.2	15.6	101.8	0	1	0	0	0	1	1	1	0	0	0	0	0	0	0	9.03	3.27	1
57	60	1	13	1	0	171	86				0	0	1	0	0	0	0	1	0	0	0	0	0	0	0	0	0	0.8	75.4	15.9	7.5	0	1	0	0		2	0	2	0	0	0	0	0	0	0	19.39	3.11	2
58	66	1	13	1	0	172.4	83.2	134	90	74	1	0	1	0	0	0	0	0	0	0	0	0	0	0	0	0	0	1.15	54.7	15.5	18.4	0	1	0	0	0	2	0	1	0	0	0	0	0	3	1	16.44	3.2	1
59	46	1	13	1	0	174	68	129	84	72	0	0	1	0	0	0	0	1	0	0	0	0	0	0	0	0	0	0.66	101.9	15.1	66.8	0	1	0	0	0	2	0	3	1	0	0	0	0	1	0	16.09	2.91	1
60	66	1	13	1	0	168	88	154	85	66	1	0	1	0	0	0	0	0	0	0	0	0	0	0	0	0	0	0.43	146.8	15.2	37.7	0	1	0	0	0	1	1	1	0	0	0	0	0	0	0	8.44	2.34	1
61	43	1	13	1	0	173	80	184	132	105	1	0	1	0	0	0	0	1	0	0	0	0	0	0	0	0	0	0.52	134.8	16.1	196.7	0	1	0	0	0	1	1	1	0	0	0	0	0	3	1	12.08	3.46	2
62	87	0	13	1	0	147	42	88	57	86	1		1	0	0	0	0	0	0	0	0	0	1	0	0	0	0	1.25	31.7	12.3	1934.6	0	3	1	0	1	1	1	1	0	0	0	0	0	0	0	6.08	1.78	2
63	68	1	13	1	0	160	60	132	116	57	0	0	0	0	0	0	0											0.76	63.4	10.9	299.7	0	3	1	1	1	2	0	3	1	0	0	0	0	0	0	13.09	2.48	1
64	46	1	13	1	0	164	80	162	93	65	1	1	0	0	1	0	1	1	0	0	0	1	1	1	0	1	0	0.96	67.6	18.6	16.2	0	1	0	0	0	1	1	2	0	0	0	0	0	0	0	13.25	1.42	1
65	48	1	13	1	0	168	80	139	75	38	1	1		0	0	0	0	1	0	0	0	1	1	1	0	1	1	1.61	37.9	13.3	20.4	0	1	0	0	0	2	0	1	0	0	0	0	0	0	0	32.68	2.53	1
66	60	1	13	1	0	163	59	126	102	88	1	0	0	0	0	0	0	1	0	0	0	0	0	0	0	0	0	0.79	77.5	12.8		0	1	0	0	0	1	1	2	0	0	0	0	1	0	0	10.97	2.63	2
67	53	1	13	1	0	170	70	151	87	78	1	1	1	0	0	0	0	1	0	0	0	0	0	0	0	1	1	0.65	99.5	15.7	7.3	0	1	0	0	0	1	1	1	0	0	0	0	0	1	0	12.25	1.59	1
68	41	1	13	1	0	172	85	134	93	97	0	1	1	0	0	0	0	1	0	0	0	0	0	0	0	0	0	0.78	87.7	17.6	4.4	0	1	0	0	0	1	1	1	0	0	0	0	0	0	0	17	2.51	2
69	71	1	13	1	0	168	64	149	91	67	1	0	0	0	0	0	0	0	0	0	0	0	0	0	0	0	0	0.74	79.4	14.7	90.2	0	1	0	0	0	1	1	1	0	0	0	0	0	3	1	10.66	3.19	2
70	76	1	13	1	0	165	51	132	70	59	1	0	1	0	1	0	0	0	0	0	0	0	0	0	0	0	0	0.92	61.3	13.9	53.9	0	1	0	0	0	3	0	1	0	0	0	0	0	0	0	11.97	2.05	2
71	63	1	13	1	0	159	65	182	110	96	1	1	1	0	0	0	0	0	1	0	1	1	0	0	0	0	0	0.76	79.8	14.9	182.8	0	1	0	0	0	1	1	2	0	0	0	0	0	2	0	11.38	1.92	1
72	87	1	13	1	0	156	46	165	92	78	1	0	1	0	0	0	0	0	0	0	1	1	0	1	0	0	0	1.2	44.1	12.8	77.9	0	1	0	0	0	1	1	1	0	0	0	0	0	2	0	8.21	2.82	3
73	69	1	13	1	0	167	63.2	100	78	90	0	0	1	0	0	0	0	0	0	0	0	0	0	0	0	0	0	0.6	100.6	13.8	104.7	0	1	0	0	0	1	1	2	0	0	0	0	0	0	0	10.15	3.71	1
74	76	1	14	1	0	164	60	152	82	102	1	0	0	0	0	0	0	1	1									0.86	66	15.7	45.2	0	1	0	0	0	1	1	1	0	1	0	1	0	3	1	5.84	3.06	1
75	69	1	14	1	0	167	70	141	75	50	1	1	1	0	1	0	1	0	1	0	1	1	0	1	0	1	0	0.75	78.8	15.2		0	1	0	0	0	3	0	2	0	0	0	0	0	0	0	29.76	2.63	3
76	66	0	14	1	0	153	47	170		76	1	0	1	0	0	0	0	1	0	0	0	0	0	1	0	0	0	0.38	124.2	15.4	256.9	1	1	0	0	0	1	1	1	0	0	0	0	0	2	0	7.92	2.23	2
77	50	1	14	1	0	165.8	78	180		86	1	0	0	0	0	0	0	1	0	0	0	1	0	1	0	0	0	0.89	71.7	16.2	5.3	0	1	0	0	0	1	1	3	1	0	0	0	0	0	0	21.44	2.01	2
78	68	1	14	1	0	167	64.8	166	78	92	1	0	0	0	0	0	0	0	0	0	0	0	0	0	0	0	0	0.93	62.6	14.8	97.4	0	1	0	0	0	3	0	1	0	0	0	0	0	0	0	12.24	2.76	2
79	73	1	14	1	0	163	56				0	0	0	0	0	0	0	1	0	0	0	0	0	0	0	0	0	0.67	87.8	16	26.4	0	1	0	0	0	1	1	1	0	0	0	0	0	0	0	26.95	2.36	2
80	42	1	14	1	0	175	70	158	98	108	1	0	0	0	0	0	0	1	0	0	0	0	0	0	0	0	0	0.93	71.8	17.4	64.8	0	1	0	0	0	1	1	1	0	0	0	1	0	3	1	20.2	4.89	1
81	80	1	14	1	0	172	53	91	50	90	1	0	0	0	0	0	0	0	0	0	0	1	0	1	0	0	0	3.11	15.9	10.7	876.4	0	1	0	0	1	1	1	1	0	0	0	0	0	0	0	17.34	2.25	2
82	66	0	14	1	0	155	53	142	111	93	1	0	0	0	0	0	0	0	0	0	0	0	0	0	0	0	0	0.5	92	13.4	33.2	0	1	0	0	0	3	0	1	0	0	0	0	0	1	0	20.02	3.29	1
83	84	0	14	1	0	135	31	122	78	96	0	0	0	0	0	0	0	0	0	0	0	0	0	0	0	0	0	0.5	85.8	6.5	485.6	0	1	0	0	0	1	1	1	0	0	0	0	0	2	0	15.96	2.92	2
84	44	1	14	1	0	175	110	158	80	66	1	1	1	0	0	0	0	1	0	0	0	0	0	0	0	0	0	0.91	71.2	16.9	6.5	0	1	0	0	0	2	0	1	0	0	0	0	0	0	0	17.67	3.01	2
85	75	1	14	1	0	158	58	182	76	86	1	1	0	0	0	0	0	1	0	0	0	0	0	0	0	0	0	0.7	83	16.1	69.9	0	1	0	0	0	1	1	1	0	0	0	0	0	0	0	6.03	1.36	1
86	51	1	14	1	0	171	88	118	90	82		0	0	0	0	0	0	1										0.77	83.5	14.9	5.7	0	1	0	0	0	1	1	1	0	0	0	0	1	0	0	16.52	2.48	1
87	70	0	14	1	0	140	33.9	123	64	120		0	0	0	0	0	0	1										0.66	66.7	11.8	128.9	0	1	0	0	0	2	0	2	0	0	0	0	0	0	0	11.45	1.92	3
88	39	1	14	1	0	168	83	132	75	65	1	0	0	0	0	0	0	0	0	0	0	1	0	0	0	1	0	0.59	120.7	14.6	19.2	0	1	0	0	0	3	0	1	0	0	0	0	0	3	1	14.89	2.77	1
89	77	1	14	1	0	159	58	208	99	75	1	0	1	0	0	0	0	0	0	0	0	0	0	0	0	0	0	0.74	70.2	15.8	31.8	0	1	0	0	0	1	1	2	0	0	0	0	0	0	0	12.04	2.32	2
90	59	1	14	1	0	175	74.4	75	72	85	0	0	1	0	0	0	0		0	0	0	0	0	0	0	0	0	1.13	52.7	14.5	10.8	0	3	1	1	1	1	1	1	0	0	0	0	0	3	1	8.15	2.78	2
91	52	1	14	1	0	175	75	163	97	71	1	1		0	0	0	0	1	0	1	0	1	0	1	0	1	0	1.04	59.8	13.6	25.8	0	1	0	0	0	3	0	3	1	0	0	0	0	2	0	29.76	3.79	1
92	84	1	14	1	0	158	43	148	74	66	1	0	0	0	0	0	0	1										0.85	65	15.8	68.6	0	1	0	0	0	1	1	1	0	0	0	0	0	1	0	15.3	2.87	2
93	83	1	14	1	0	160	55	109	78	80	1	0	1	0	0	0	0	0	0	0	0	0	0	1	0	0	0	0.78	71.6	14.2	24.9	0	1	0	0	0	1	1	2	0	0	0	1	0	1	0	13.15	3.07	1
94	64	1	14	1	0	168.6	64.8	113	73	98	0	0	0	0	0	0	0	0	0	0	0	0	0	0	0	0	0	0.99	54.6	8.6	14.7	0	1	0	0	0	2	0	1	0	0	0	0	0	0	0	14.96	3.45	2
95	68	1	14	1	0	172	71.6	107	66	90	1	1	0	1	1	0	0	0	1	0	0	0	0	1	0	0	0	8.73	5.2	11.9		0	1	0	0	0	1	1	3	1	0	0	1	0	2	0	18.86	3.02	1
96	79	1	14	1	0	163	58	124	70	55	1	0	0	0	0	0	0	0	0	0	0	0	0	0	0	0	0	1.68	31.4	13.1	434.2	1	1	0	0	0	2	0	2	0	0	0	0	0	0	0	26.92	2.3	1
97	72	1	14	1	0	142	63	107	53	64	0	1	0	0	0	0	0	0	0	0	0	0	0	0	0	1	0	0.44	103.1	14.2	11.2	0	1	0	0	0	1	1	1	0	0	0	0	0	2	0	14.65	3.18	3
98	50	1	14	1	0	171	83	124	87	57	1	0	0	0	0	0	0	0	0	0	0				0	0	0	0.92	69.2	16.6	4.9	0	1	0	0	0	2	0	1	0	0	0	0	0	0	0	30.07	3.8	2
99	52	1	14	1	0	168	73	149	124	106	1	0	1	0	0	0	0	1	0	0	0	1	0	1	0	0	0	0.91	69.2	14.1	19.9	0	1	0	0	0	1	1	2	0	0	0	0	0	0	0	12.36	2.72	1
100	88	0	14	1	0	157	42	166	77	68	1	1	0	0	0	0	0	0	0	0	0	1	0	1	0	0	0	0.8	33.7	10		0	1	0	0	0	2	0	2	0	0	0	0	0	3	1	8.32	4.03	1
101	80	1	14	1	0	162	61	186	100	78	1	1	0	0	0	0	0	0	0	0	0	1	0	0	0	1	0	0.93	59.7	13.7	43.4	0	1	0	0	0	1	1	1	0	0	0	0	0	3	1	24.54	2.4	2
102	70	1	14	1	0	170.8	70.6	93	62	46	1	1	0	0	0	0	0	0	1	0	0	0	0	1	0	0	0	1.11	51.1	14.5	176.6	0	1	0	0	0	2	0	1	0	0	0	0	1	0	0	5.33	0.76	3
103	54	1	14	1	0	161	79.6	170	90	110	1	1	0	0	0	0	0	1	1	0	0	0	0	0	0	0	0	0.67	95.7	15.7	12.6	0	1	0	0	0	2	0	1	0	0	0	0	0	1	0	10.57	2.45	2
104	79	0	15	1	0					91	0		0	0	0	0	0											0.87	40.6	14.3	233.7	0	3	1	1	1	1	1	1	0	0	0	0	0	0	0	18.8	1.9	1
105	82	1	15	1	0	163	64	190	109	106	1	1	1	0	0	0	0	1	1	0	0	1	1	0	0	1	0	1.19	45.3	14.3	228.3		1	0	0	0	1	1	1	0	0	0	0	0	0	0	17.61	2.19	1
106	46	1	15	1	0	171	85	188	120	108	1	1	0	0	0	0	0	1	0	0	0	0	0	1	0	1	0	0.73	91.2	14.6	11.1	0	3	1	1	1	1	1	1	0	0	0	0	1	0	0	13.29	2.69	2
107	53	1	15	1	0	161.5	68.7	130	88	78	1	1	1	0	0	0	0	1	0	0	0	1	0	1	0	0	0	1.11	55.4	17.9	5.9	0	1	0	0	0	3	0	1	0	0	0	0	0	0	0	13.45	2.32	1
108	86	0	15	1	0	150	62	170	106	110	1	1	1	0	0	0	0	0	0	0	1	0	0	1	1	0	0	1.08	36.7	13.9	644.6	0	1	0	0	0	2	0	2	0	0	0	0	0	3	1	21.67	4.28	2
109	88	1	15	1	0	165	75	110	70	50	0	0	1	0	0	0	0	0	0	0	0	0	0	0	0	0	0	1	53.7	17.3	135	0	1	0	0	1	1	1	2	0	1	0	0	0	2	0	11.43	3.44	1
110	79	1	15	1	0	157	61.5	157	90	100	0	1	1	0	0	0	0	0	1	0	1	0	0	0	0	1	0	0.64	66.7	13.5	373.4	0	1	0	0	0	1	1	1	0	0	0	0	0	3	1	22.52	1.63	2
111	77	0	15	1	0	133.8	34	80	50	40	1	1	1	0	1	0	0	0	1	1	1	0	1	0	0	1	1	0.87	48	10.2	638	0	3	1	0	1	2	0	1	0	0	0	0	0	2	0	19.45	3.05	2
112	69	1	15	1	0	166	58.9	140	86	90	1	1	1	0	1	0	1	1	0	1	1	1	0	0	0	1	1	2.82	18.5	12.4	167.5	0	1	0	0	0	2	0	1	0	0	0	0	0	2	0	23.51	3.5	3
113	65	1	15	1	0	160	60	145	96	76	1	1	0	0	0	0	0	0										0.53	94.1	13.9	13.8	0	3	1	1	1	1	1	2	0	0	0	0	0	0	0	10.38	2.41	2
114	88	1	15	1	0	150	46.9	114	57	80	1	0	1	0	0	0	0		0	0	0	0	1	1	0	0	0	1.75	21.5	10.5	1247.4	0	2	1	0	0	1	1	1	0	0	0	0	0	0	0	13.99	2.75	1
115	35	1	15	1	0			47	43	182		1		0	0	0	0		0	0	0	0	0	0	0	0	0	1.27	36.2	11.4	15.2	0	3	1	1	1	1	1	3	1	0	0	0	0	1	0	33.5	2.94	2
116	67	1	15	1	0	170	77.1	154	92	80	0	1	0	0	0	0	0	0	0	0	0	0	0	0	0	0	0	0.74	80.7	7.5		0	1	0	0	0	1	1	1	0	0	0	0	0	3	1	14.62	3.28	1
117	81	1	15	1	0	154	53	133	64	64	1	1	1	0	1	0	0	0	1	0	1	0	0	1	0	1	1	0.64	89.6	12.1	20	0	1	0	0	0	2	0	2	0	0	0	0	0	0	0	16.54	3.69	2
118	78	1	15	1	0	155	49	140	73	87	1	1	0	1	0	0	0	0	0	0	0	0	0	1	1	0	1	4.24	8.5	13.9	1720.2	0	2	1	0	0	1	1	1	0	0	0	0	0	3	1	10.36	2.34	1
119	80	1	15	1	0	158	58	150	86	60	1	0	1	0	0	0	0	0	0	0		0	0	0	0	0	0	0.95	58.3	12.8	8.9	0	1	0	0	0	2	0	2	0	0	0	0	0	0	0	22.86	2.19	2
120	69	1	15	1	0	158	51	146	77	105	1	1	1	0	1	0	1	1	1	0	1	1	1	1	1	1	1	1.89	28.7	8.8	4057.9	0	2	1	0	0	1	1	2	0	0	0	0	0	0	0	9.78	2.51	1
121	63	1	15	1	0	165	87	127	78	55	1	1	0	0	0	0	0	1	0	0	0	1	1	1	0	1	0	1.65	34.2	13.7	109.7	0	1	0	0	0	3	0	3	1	0	0	0	0	0	0	18.77	3.31	2
122	76	1	15	1	0	167	65.7	130	82	93	0	1	0	0	0	0	0	1	0	0	0	0	0	0	0	1	0	0.83	68.6	17.1	45.3	0	1	0	0	0	1	1	2	0	0	0	0	0	3	1	12.22	1.95	1
123	60	1	15	1	0	175	55	130	70	70	0	0	0	0	0	0	0	1	0	0	0	0	0	0	0	0	0	0.48	133.7	15.5	10.7	0	1	0	0	0	2	0	1	0	0	0	0	0	3	1	15.52	4.31	3
124	74	1	15	1	0	165	65	171	82	92	1	0	1	0	1	0	1	0						1				0.89	64.1	13.9	59.4	0	1	0	0	0	1	1	2	0	0	0	0	0	3	1	17.14	2.26	1
125	70	1	16	2	0	165	60	136	70	66	0	0	1	0	0	0	0	1										1.08	52.7	15.1	18.8	0	1	0	0	0	2	0	1	0	0	0	0	0	3	1	12.98	3.74	1
126	80	1	16	2	0	165	53.9	109	78	117	1	0	0	0	0	0	0	0	0	0	0	0	0	0	0	0	0	1.27	42.5	14.3	1400.6	0	1	0	0	0	1	1	1	0	0	0	0	0	0	0	13.7	3.56	1
127	75	0	16	2	0	154	61	106	73	88	1	1	1	0	0	0	0	0	0	0	1	0	0	0	0	0	0	0.58	76.8	13.9	21.2	0	1	0	0	0	1	1	1	0	0	0	0	1	2	0	12.56	2.43	2
128	84	1	16	2	0	165	56	140		80	1	0	0	0	0	0	0	0	0	0	0	0	0	1	0	0	0	0.76	77.9	14.3	173.1	0	1	0	0	0	1	1	1	0	0	0	0	0	0	0	17.78	2.47	1
129	63	1	16	2	0	173	57.7	121	63	58	1	0	1	0	0	0	0	1	0	0	1	1	0	1	0	0	0	1.22	47.5	13.4	8.5	0	1	0	0	0	2	0	2	0	0	0	0	0	2	0	12.54	2.82	1
130	57	1	16	2	0	162	58	178	95	78	1	0	0	0	0	0	0	0	0	0	0	0	0	0	0	0	0	0.74	84.5	13.9		0	1	0	0	0	1	1	2	0	0	0	0	0	0	0	15.17	3.07	1
131	78	1	16	2	0	158	60	148	76	90	1	0	1	0	0	0	0	0	0	0	1	1	1	1	0	0	0	0.87	64.7	12.2	81.3	1	1	0	0	0	2	0	1	0	0	0	0	0	2	0	16.97	3.3	2
132	73	1	16	2	0	159	60.2	132	71	93	1	0	1	0	0	0	0	0	1	0	1	0	0	1	0	0	0	0.82	70.4	13.1	24.6	0	1	0	0	0	1	1	2	0	0	0	0	0	0	0	16.76	1.73	2
133	49	1	16	2	0	170	108	134	92	72	1	1	1	0	0	0	0	1	0	0	0	0	0	0	0	0	0	0.61	109	14.2	27.8	0	1	0	0	0	1	1	1	0	0	0	0	0	2	0	8.11	2.74	2
134	97	1	16	2	0	137	42	134	71	72	0	0	0	0	0	0	0	0	1	0	0	0	0	0	0	0	0	1.01	38.2	10.8	615.7	0	2	1	0	0	1	1	1	0	0	0	0	0	2	0	7.38	1.92	1
135	49	1	16	2	0	167	75	126	62	60	1	0	1	0	0	0	0	1	0	0	0	0	0	0	0	0	0	0.87	73.9	14.1	68.6	0	1	0	0	0	2	0	3	1	0	0	0	0	2	0	19.34	2.81	2
136	84	1	16	2	0	149	36.6	160	90	97	1	0	1	0	0	0	0	0	0	0	0	0	0	0	0	0	0	0.47	124.2	12.1	1248.5		1	0	0	0	1	1	2	0	0	0	0	0	3	1	19.82	2.3	3
137	72	0	16	2	0	148	70	175	116	76	1	1	1	0	0	0	0	0	0	0	1	1	0	0	0	1	0	0.85	76.2	12.4	152.1	0	1	0	0	0	1	1	1	0	0	0	0	0	0	0	12.09	2.31	1
138	54	1	16	2	0	169.5	70	130	82	84	1	0	0	0	0	0	0	1	0	0	0	0	0	0	0	0	0	1.13	54	15.3	13.6	0	1	0	0	0	1	1	1	0	0	0	0	0	0	0	14.54	2.73	1
139	86	0	16	2	0	146	46	160		80	1		1	0	0	0	0	0	0	0	0	0	0	0	0	0	0	0.63	66.2	13.1	212.9	0	1	0	0	0	2	0	3	1	0	0	0	0	2	0	6.65	1.69	2
140	46	1	16	2	0	174	75	148	91	98	1	1	1	0	0	0	0	1	0	0	0	0	0	0	0	1	0	0.48	144.3	15.7	4	0	1	0	0	0	2	0	2	0	0	0	0	0	0	0	14.96	2.91	2
141	64	1	16	2	0	170	63	124	92	90	0	0	1	0	0	0	0	0	0	0	0	0	0	0	0	0	0	0.58	106.7	13.6	474.9	0	1	0	0	0	1	1	2	0	0	0	1	0	0	0	16.51	1.9	1
142	67	0	16	2	0	148	51.8	218	99	67	1	0	1	0	0	0	0	0	0	0	0	0	0	0	0	0	0	0.51	89.6	14.4	88.1	0	1	0	0	0	1	1	1	0	0	0	0	0	0	0	12.82	1.97	2
143	86	1	16	2	0	155	52	144	78	62	1	0		0	0	0	0	1	0	1	0	1	0	1	0	0	0	0.77	71.9	13.9	104.6	0	1	0	0	0	3	0	1	0	0	0	0	1	2	0	15.18	3.44	2
144	71	1	16	2	0	168	64	132	94	75	0	0	1	0	0	0	0		0	0	0	0	0	0	0	0	0	0.69	85.7	14.6	26.3	0	1	0	0	0	2	0	1	0	0	0	0	0	3	1	21.13	4.41	1
145	45	1	16	2	0	170	84	118	70	70	1	0	1	0	0	0	0	1	0	0	0	1	1	1	0	0	0	0.83	79.8	14.8	88.3	0	1	0	0	0	3	0	1	0	0	0	0	0	0	0	16.33	2.93	2
146	76	1	16	2	0	175	91	139	82	60	1	1	1	0	0	0	0	0	0	0	1	1	0	1	0	1	0	0.97	57.9	14.4	37.4	0	1	0	0	0	2	0	1	0	0	0	0	0	0	0	14.39	3.19	2
147	83	0	16	2	0	145	58	102	70	48	1	1	1	0	0	0	0	0	1	0	1	1	0	1	0	0	0	0.62	68	13.9	615.2	0	2	1	0	1	1	1	2	0	0	0	0	0	1	0	17.69	1.86	1
148	61	0	16	2	0	151	47	146	96	110	1	1	0	0	0	0	0	0	0	0	0	0	0	0	0	1	0	0.38	127	14.8	2118.1	1	2	1	0	0	1	1	2	0	0	0	0	1	2	0	13.44	2.69	3
149	54	1	16	2	0	176	92	106	80	79	0	0	1	0	0	0	0	1	0	0	0	0	0	0	0	0	0	1	61.7	17.3	4	0	1	0	0	0	2	0	2	0	0	0	0	0	0	0	14.18	2.88	2
150	55	1	16	2	0	178	86	104	71	56	1	0	1	0	0	0	0	1	1	1								0.61	105.5	15.8	12.7	0	1	0	0	0	3	0	2	0	0	0	0	0	2	0	23.58	1.71	1
151	69	1	16	2	0	167	77	180	112	95	1	1	1	0	0	0	0	0	0	0	0	0	1	0	0	0	0	3.59	14.2	14.7	565.6		1	0	0	0	1	1	2	0	0	0	0	0	3	1	28.77	2.32	3
152	64	1	16	2	0	165	63.4	184	120	94	1	0	0	0	0	0	0	0	0	0	0	0	0	0	0	0	0	0.77	78.3	16	35.5	0	1	0	0	0	1	1	1	0	0	0	0	0	3	1	9.79	2.61	2
153	63	1	16	2	0	167	61	134	84	89	0	1	0	0	0	0	0	1	0	0	0	0	0	0	0	1	0	2.33	23.4	10.8	455	1	1	0	0	0	1	1	1	0	0	0	0	0	0	0	16.84	2.85	1
154	60	1	16	2	0	168	73.9	133	101	81	0	0	1	0	0	0	0	1	0	0	0	0	0	0	0	0	0	0.88	68.9	15.8	182.7	0	1	0	0	0	1	1	2	0	0	0	0	1	0	0	10.73	3.43	1
155	62	1	16	2	0	177	71.4	166	64	63	1	0	1	0	0	0	0	1	0	0	0	0	0	0	0	0	0	0.95	62.8	17.2	28.8	0	1	0	0	0	1	1	2	0	0	1	0	1	0	0	21.42	3.49	1
156	93	0	16	2	0	150	55	86	44	54		1		0	0	0	0										1	1.48	25.4	9	861.4	0	3	1	0	1	2	0	3	1	1	0	0	0	0	0	10.72	2.83	2
157	68	1	16	2	0	182.5	72	66	46	80	0	0	1	0	1	0	1	0	1	0	1	0	0	0	0	0	0	1.07	53.7	12.2	493.8	0	3	1	0	1	1	1	1	0	0	0	0	1	2	0	11.82	3.54	2
158	59	1	17	2	0	172	70	163	112	83	1	0	0	0	0	0	0	1	1	0	0	1	1	0	1	0	0	0.45	114.2	13.7	75.1	0	1	0	0	0	1	1	1	0	0	0	0	1	0	0	12.53	2.61	2
159	73	1	17	2	0	162.1	57.4	146	85	71	0	0	0	0	0	0	0	1										0.87	69.4	12.8	18.2	0	1	0	0	0	1	1	1	0	0	0	0	0	0	0	7.98	3.45	1
160	75	1	17	2	0	166	59.5	148	81	80	1	0	1	0	0	0	0	1	1	0	0	0	0	1	0	0	0	0.73	79.3	12.4	295.3	0	1	0	0	0	2	0	1	0	0	0	0	0	2	0	32.63	3.26	2
161	89	0	17	2	0	150	42.5	112	70	84	1	0	0	0	0	0	0	0	0	0	0	0	0	1	0	0	0	0.73	55.8	12.7	101	0	1	0	0	0	1	1	2	0	0	0	0	0	2	0	9.45	2.29	1
162	60	0	17	2	0	147	52	161	88	58	1	0	0	0	0	0	0	1	0	0	0	1	0	0	0	0	0	0.67	68.6	14.4	21.3	0	1	0	0	0	2	0	2	0	0	0	0	0	3	1	3.7	1.45	3
163	84	0	17	2	0	143	54	162	100	104	1	1	0	0	0	0	0	0	1	0	1	1	0	0	0	0	0	0.64	65.5	13.6	339	0	2	1	0	0	1	1	2	0	0	0	0	0	1	0	19.83	1.86	1
164	65	1	17	2	0	171	66	108	75	65	1	0	1	0	0	0	0	0	0	1	1	1	0	1	0	0	0	1.15	50.2	14.5	20.5	0	1	0	0	0	1	1	3	1	0	0	0	0	0	0	11.81	3.55	2
165	77	1	17	2	0	163	58.3				0	1	0	0	0	0	0	1	0	0	0	0	0	0	0	0	0	0.58	101.2	10.8	380.8	0	1	0	0		2	0	2	0	0	0	0	0	0	0	24.1	3.17	3
166	76	1	17	2	0	165	60	118	64	66	1	0	0	0	0	0	0	1	0	0	0				0	0	0	0.87	65.2	13.3	92.7	0	1	0	0	0	1	1	1	0	0	0	0	0	0	0	12.6	3.62	1
167	79	1	17	2	0	160	69	96	51	58	0	0	1	0	1	0	1	0	1	0	1	0	0	0	0	0	0	1.14	48	12.7	287.4	0	1	0	0	0	2	0	2	0	0	0	0	0	0	0	18.18	2.33	1
168	61	1	17	2	0	168	60	154	82	90	1	0	0	0	0	0	0	1	0	0	0	0	0	0	0	0	0	0.66	93.9	12.4	81	0	1	0	0	0	1	1	1	0	0	0	0	1	0	0	11.68	2.37	1
169	69	1	17	2	0	166	52	76	49	36	1	0	0	0	0	0	0	0	0	0	0	1	0	1	0	0	0	0.85	68.7	9	96	0	1	0	0	1	2	0	1	0	0	0	0	0	0	0	13.57	3.65	3
170	69	0	17	2	0	160	67	145	60	80	1	0	1	0	0	0	0	0	0	0	0	0	0	0	0	0	0	0.52	87	13.3	34.1	0	1	0	0	0	1	1	2	0	0	0	0	1	0	0	12.68	2.61	2
171	88	1	17	2	0	159	56	140	70	70	1	0	0	0	0	0	0	0	0	0	0	0	0	1	0	0	0	0.71	78.1	14.5	83.8	0	1	0	0	0	1	1	1	0	0	0	0	0	0	0	6.75	1.86	1
172	65	1	17	2	0	160	60	132	82	70	1	1	1	0	1	0	1		1	0	1	1	0	0	0	1	1	0.56	110.4	11.8	43.6	0	1	0	0	0	1	1	1	0	0	0	0	0	0	0	10.09	3.11	2
173	84	1	17	2	0	160	60	146	89	93	1	0		0	0	0	0	0	0	0	0	1	0	1	1	0	0	0.87	63.3	16.3	32.7	0	2	1	0	0	1	1	1	0	1	0	0	1	1	0	11	3.39	1
174	76	1	17	2	0	162	61	142	87	121	1	1	0	0	0	0	0	1	0	0	0	0	0	0	0	0	0	0.84	67.7	11.2	373.8	0	2	1	0	0	2	0	3	1	0	0	0	0	3	1	22.84	3.78	1
175	83	1	17	2	0	150	48	63	31	39	1	1	1	0	1	0	1	0	0	1	1	1	1	1	0	1	0	1.69	30.7	10.3		0	3	1	0	1	3	0	2	0	0	0	0	0	0	0	16.05	2.29	1
176	88	0	17	2	0	145	32.5	118	60	54	1	0	0	0	0	0	0	0	0	0	0	1	0	1	0	0	0	0.4	108.1	10.2	223.3	0	1	0	0	0	2	0	2	0	0	0	0	0	3	1	6.42	2.86	2
177	46	1	17	2	0	178	76	118	82	78	0	1	1	0	0	0	0	1										0.87	75.3	16.1	8.4	0	1	0	0	0	1	1	1	0	0	0	0	0	3	1	6.72	3.56	3
178	69	1	17	2	0	168	65	150	92	43	1	0	1	0	1	0	0	0	1	0	1	0	0	1	0	0	0	1.06	59.1	12.9	11.2	0	1	0	0	0	2	0	1	0	0	0	0	0	1	0	19.57	2.35	1
179	88	1	17	2	0	163	63.2	121	74	86	1	0	1	0	0	0	0	0	0	0	1	0	0	1	0	0	0	0.68	81.8	13.3	17.9	0	1	0	0	0	1	1	1	0	0	0	0	0	0	0	12.21	2.95	1
180	67	1	17	2	0	173	59	109	76	90	0	0	1	0	1	0	1	0	1	0	1	0	0	0	0	0	0	0.67	89.9	12.6	43.6	0	1	0	0	0	3	0	1	0	0	0	0	0	0	0	15.48	1.92	2
181	76	1	18	2	0	175	78	146	64	87	1	1	1	0	0	0	0	0	0	0	1	1	1	1	0	0	0	0.78	68.6	15.7	200.5	0	1	0	0	0	1	1	1	0	0	0	0	0	1	0	19.12	3.46	2
182	71	0	18	2	0	148	55	113	62	72	1	1	1	0	0	0	0	0	0	0	1	0	0	1	0	0	0	0.78	55.4	11.3	155.4	0	1	0	0	0	1	1	2	0	0	0	0	0	2	0	12.91	3.05	2
183	70	1	18	2	0	163.1	47.4	194	111	97	1	1	1	0	1	0	1	1	0	0	0	0	0	0	0	0	0	0.81	72.2	14.7	174	0	1	0	0	0	2	0	2	0	0	0	0	0	0	0	21.52	1.33	1
184	78	1	18	2	0	162	47.3	145	113	80	0	0	0	0	0	0	0	0	0	0	0	0	0	0	0	0	0	0.78	72.9	11.9	142.2	0	3	1	1	1	3	0	2	0	0	0	0	0	0	0	19.7	3.54	2
185	73	1	18	2	0			155	106	110	1	0	0	0	0	0	0	0	0	0	0	0	0	0	0	0	0	0.86	66.8	13.1	242.2	0	3	1	1	1	2	0	1	0	0	0	0	0	0	0	15.33	3.77	1
186	79	0	18	2	0	145	57	188	82	97	1	0	0	0	0	0	0	0	0	0	0	0	1	1	0	0	0	0.72	58.6	11.2	358.2	1	2	1	0	0	1	1	2	0	0	0	0	0	2	0	10.29	2.02	2
187	77	0	18	2	0	153	38	135	78	75	0	1	1	0	0	0	0	0	0	0	0	0	0	0	0	0	0	0.75	56.5	10.2	1224.5		1	0	0	0	2	0	3	1	0	0	0	0	0	0	28.73	2.06	2
188	71	1	18	2	0	157	60	185	110	84	1	0	1	0	0	0	0	1	1	0	0	1	1	1	0	0	0	0.51	119.2	13.7	39.9	0	1	0	0	0	2	0	3	1	0	0	0	0	1	0	21.16	2.2	1
189	71	1	18	2	0	174	69	163	101	95	1	1	0	0	0	0	0	0	0	0	0	0	1	1	0	1	0	1.04	54.7	14.9	151.2	0	1	0	0	0	3	0	1	0	0	0	0	0	0	0	17.17	3.03	2
190	64	1	18	2	0	163	59.6	158	95	110	1	0	1	0	0	0	0	1										1.1	42.4	14.1	19.6	0	3	1	1	1	1	1	1	0	0	1	0	1	2	0	10.49	2.85	3
191	71	1	18	2	0	160	70	135	82	74	1	1	0	0	0	0	0	1	0	0	0	0	0	0	0	1	0	0.68	87	13.7	376.7		1	0	0	0	1	1	3	1	0	0	0	1	2	0	19.39	2.16	1
192	67	1	18	2	0	165	71	141	92	92	1	0	0	0	0	0	0	0	0	0	0	1	0	1	0	0	0	0.99	58.7	14.6	37	0	1	0	0	0	1	1	1	0	0	0	0	0	0	0	15.09	2.29	2
193	49	1	18	2	0	173	75	141	105	107	1	0	1	0	0	0	0	1	0	0	0	0	0	0	0	0	0	0.61	109	15.5	59.7	0	1	0	0	0	1	1	3	1	0	0	0	1	0	0	27.34	1.86	2
194	58	1	18	2	0	171	67.8	140	76	104	1	0	0	0	0	0	0	0	0	0	0	0	0	0	0	0	0	0.93	65.5	14.5	96.1	0	3	1	1	1	3	0	3	1	0	0	0	0	2	0	16.43	2.11	2
195	91	1	18	2	0	160	56	121	60	58	1	0	1	0	0	0	0	0	1	0	1	1	0	0	1	0	0	1.8	27.9	10.7	940	0	1	0	0	0	1	1	1	0	0	0	0	0	2	0	16	2.28	2
196	83	0	18	2	0	152	56	124	56	66	1	1	1	0	0	0	0	0	0	0	0	1	0	1	0	1	0	0.88	46.4	12.2	25.4	0	1	0	0	0	2	0	2	0	0	0	0	1	2	0	26.56	2.09	3
197	76	1	18	2	0	167	70	172	80	72	1	1	1	0	0	0	0	0	0	0	1	1	0	1	0	0	0	0.97	57.9	15.8	20.1	0	1	0	0	0	2	0	2	0	0	0	0	0	3	1	9.39	2.59	2
198	46	1	18	2	0	166.9	71.1	209	124	82	1	0	1	0	0	0	0	0	0	0	0	0	0	0	0	0	0	0.85	77.2	15.7	46.8	0	1	0	0	0	3	0	1	0	0	0	0	0	3	1	11.68	1.46	1
199	77	1	18	2	0	158	70.6	126	59	56	1	1	1	0	1	0	0	0	0	0	1	0	0	1	0	1	0	0.72	79.9	12.5	19	0	1	0	0	0	2	0	1	0	0	0	0	0	0	0	35.6	2.84	2
200	63	0	19	2	0	149	50	210	110	84	1	1	1	0	0	0	0	0	0	0	0	0	0	0	0	0	0	0.45	104.6	14.3	42.7	0	1	0	0	0	2	0	1	0	0	0	0	0	0	0	14.17	3.03	3
201	57	1	19	2	0	171	63.1	158	95	111	0	0	1	0	0	0	0	1	0	0	0	0	0	0	0	0	0	0.81	76.6	14	64.7	0	3	1	1	1	1	1	1	0	0	0	0	1	0	0	14.62	2.63	2
202	76	0	19	2	0	146	54.6	162	98	78	1	0	0	0	0	0	0	0										0.68	60.2	12.7	37.5	0	1	0	0	0	1	1	1	0	0	0	1	1	1	0	10.68	2.13	1
203	49	1	19	2	0	183	90	134	94	102	0	1	1	0	0	0	0	1	0	0	0	0	0	0	0	0	0	0.8	81	13.5	291.3		1	0	0	0	5	0	2	0	0	0	0	0	0	0	12.4	3.24	3
204	59	0	19	2	0	160	74	209	106	88	1	0	1	0	0	0	0	1	0	0	0	0	0	0	0	0	0	0.47	101.6	15.5	147.3	0	1	0	0	0	1	1	2	0	0	0	0	0	2	0	15.96	3.1	2
205	47	1	19	2	0	164	62	140	100	72	1	0	1	0	0	0	0	0	0	0	0	0	0	1	0	0	0	1.05	60.9	16.6	7.6	0	1	0	0	0	2	0	2	0	0	0	0	0	0	0	15.37	2.89	1
206	67	1	19	2	0	173	72	80	59	16	0	0	0	0	0	0	0	1	0	0	0	0	0	0	0	0	0	0.89	65.9	15.2	7.6	0	1	0	0	1	2	0	2	0	0	0	0	0	3	1	16.63	3.07	1
207	52	1	19	2	0	174	80	199	124	105	1	1	1	0	0	0	0	1	0	0	0	1	1	0	0	1	0	0.67	96.7	17.5	249.5	0	1	0	0	0	2	0	3	1	0	0	0	0	0	0	14.45	3.38	2
208	57	1	19	2	0	163	72	138	74	84	0	1	1	0	0	0	0	1	0	0	0	0	0	0	0	0	0	0.64	99.1	14.1	36.6	0	1	0	0	0	2	0	1	0	0	0	0	0	0	0	14.11	2.76	2
209	66	1	19	2	0	170	65	130	68	56	1	0	1	0	0	0	0	1	0	0	0	0	0	1	0	0	0	1.02	57	16.1	17.4	0	1	0	0	0	2	0	3	1	0	0	0	0	2	0	7.39	2.89	1
210	45	1	19	2	0	173	63	138	103	90	1	0	1	0	0	0	0	0	0	0	0	0	0	0	0	0	0	0.83	79.8	15.4		0	1	0	0	0	1	1	1	0	0	0	0	0	0	0	14.61	2.46	1
211	81	1	19	2	0	161	67	158	116	100	1	1	1	0	1	0	1	0	1	0	1	1	1	1	1	1	0	1.76	29.6	13.9	51.5	0	3	1	1	1	3	0	1	0	0	0	0	0	1	0	10.88	2.17	2
212	67	1	19	2	0	178	55.4			43		0		0	1	0	1	0	1	1	0	0	1	0	1	0	0	1.42	40.8	9.8	90.4		1	0	0	1	3	0	3	1	1	0	0	0	0	0	8.83	3.07	2
213	80	1	19	2	0	156	45.3				1	1	1	1	1	0	1	0	1	1	0	0	1	1	0	1	0	7.37	6.2	6.9	212.8	0	3	1	1	1	1	1	2	0	1	0	0	0	2	0	9.8	2.32	2
214	75	0	19	2	0	147	51	125	87	97	0	0	1	0	0	0	0	0	0	0	0	0	0	0	0	0	0	0.58	75.4	12.1	171.8	0	1	0	0	0	1	1	3	1	0	0	1	0	0	0	7.29	2.67	1
215	70	1	19	2	0	170	68	130	84	93	1	1	0	0	0	0	0	0	0	0	0	0	0	0	1	1	0	0.55	110.2	14.7	505.5	0	2	1	0	0	1	1	3	1	0	0	0	0	2	0	8.16	2.46	1
216	74	1	19	2	0	156.8	45.6			54	1			0	0	0	0	0	0	0	1	1	0	0	0	0	0	0.86	49.2	11.1	84.7	0	1	0	0	1	1	1	2	0	1	1	0	0	3	1	13.78	2.39	1
217	40	1	19	2	0	169	67	131	72	78	1	0	1	0	0	0	0	1	1	0	0	0	1	1	0	0	0	0.8	85.9	16.1	81.2	0	1	0	0	0	1	1	1	0	0	0	0	1	3	1	12.64	2.98	2
218	62	1	19	2	0	168	83	171	96	94	1	0	0	0	0	0	0	0	0	0	0	0	0	1	0	0	0	0.87	69.1	15.5	14.1	0	1	0	0	0	1	1	1	0	0	0	1	0	3	1	12.64	3.17	2
219	69	1	19	2	0	161	78	178	100	90	1	0	0	0	0	0	0	1										1.12	50.8	14.3	12.4	0	1	0	0	0	1	1	2	0	0	0	0	0	0	0	16.12	2.33	1
220	80	0	19	2	0	157	37	98	55	82	0	0	0	0	0	0	0	1	0	0	0	0	0	0	0	0	0	0.72	58.4	11.5	765.4	1	1	0	0	0	2	0	2	0	0	0	0	1	3	1	16.8	2.37	1
221	43	0	19	2	0	165	84	154	88	101	0	0	0	0	0	0	0	0	0	0	0	0	0	0	0	0	0	0.62	82.2	14.3		0	1	0	1	0	1	1	1	0	0	0	0	0	1	0	10.28	3.59	2
222	44	1	19	2	0	179	83	111	59	74	0	1	0	0	0	0	0	1	0	0	0	0	0	0	0	1	0	0.75	89.7	14.2	4	0	1	0	0	0	2	0	1	0	0	0	0	0	0	0	14.46	3.51	2
223	77	0	19	2	0	148	50	78	44	43	0	0	1	0	0	0	0	0	0	0	0	0	0	0	0	0	0	1.04	39.5	10	30.7	0	3	1	0	0	2	0	3	1	0	0	0	0	0	0	25.92	2.76	3
224	52	1	19	2	0	166	75				1	0	1	0	0	0	0	1	0	0	0	1	0	1	0	0	0	0.91	69.2	17.4	314.9	0	1	0	0		1	1	1	0	0	0	0	0	0	0	12.63	2.15	2
225	40	1	19	2	0	178	108	160	109	78	0	1	1	0	0	0	0	1	0	0	0	0	0	0	0	1	0	0.61	115.6	16.9	4	0	1	0	0	0	1	1	2	0	0	0	0	0	0	0	5.59	2.07	1
226	83	1	19	2	0	159	56.7	208	112	80	1	0	0	0	0	0	0	0	0	0	0	0	0	0	0	0	0	0.98	55.8	15.7	102.9	0	1	0	0	0	2	0	2	0	0	0	0	0	0	0	11.68	2.59	2
227	68	1	19	2	0	161	70.3	120	74	59	1	1	1	0	0	0	0	0	0	0	0	1	0	1	0	1	0	1.17	48.7	14	31.5	0	1	0	0	0	1	1	2	0	0	0	0	0	0	0	16.3	2.83	1
228	54	1	19	2	0	175	70	137	83	42	1	0	1	0	0	0	0	1	0	0	0	1	1	0	0	0	0	1	61.7	15.6	56.2	0	1	0	0	0	2	0	3	1	0	0	0	0	0	0	32.46	2.23	2
229	65	1	19	2	0	162	62	138	90	110	1	0	1	0	0	0	0	0	0	0	0	1	0	1	0	0	0	0.63	97.1	15	81	0	1	0	0	0	1	1	2	0	0	0	0	0	1	0	16.12	1.64	1
230	58	1	19	2	0	167	62	117	75	69	0	0		0	0	0	0	1	0	0	0	0	0	0	0	0	0	0.85	72.3	15.1	12.5	0	1	0	0	0	1	1	1	0	0	0	0	0	0	0	15.13	2.39	2
231	71	0	19	2	0	150	49	142	38	72	1	1	0	0	0	0	0	0	0	0	0	1	0	1	0	1	0	0.68	64.3	11.7	385.2	1	1	0	0	0	2	0	3	1	0	0	0	0	0	0	27.31	2.01	2
232	73	1	19	2	0	160	55	145	81	72	1	0	1	0	0	0	0	0	0	0	1	1	0	1	0	0	0	0.53	85	12.6	221.9	0	1	0	0	0	1	1	2	0	0	0	0	0	2	0	12.86	2.69	2
233	73	1	19	2	0	164	69	152	72	72	1	0	0	0	0	0	0	0	0	0	0	0	0	1	0	0	0	0.74	78.7	13.7	122.7	0	1	0	0	0	1	1	1	0	0	0	1	1	2	0	22.75	2.48	2
234	87	1	19	2	0	159	72	134	60	44	1	0	0	0	0	0	0	0	0	0	0	0	0	0	0	0	0	0.73	76	12.5	143.1	0	1	0	0	0	2	0	1	0	0	0	0	0	0	0	16.96	3.47	2
235	70	1	19	2	0	170	62	49	33		1	0	1	0		0		1										0.68	87.4	13.3	16.5	0	3	1	0	1	2	0	3	1	0	0	0	0	0	0	19.38	2.04	2
236	83	0	19	2	0			109	60	89	0	0	1	0	0	0	0	0	0	0	0	0	0	0	0	0	0	1.53	25.3	9.5	625.1	0	3	1	0	1	1	1	2	0	0	0	0	0	0	0	11.87	1.82	2
237	56	0	19	2	0	156	50	147	98	69	1	1	1	0	0	0	0	0	0	0	0	0	0	0	0	0	0	0.54	88.6	13.4	34.8	0	1	0	0	0	3	0	3	1	0	0	0	1	0	0	9.8	2.62	2
238	98	0	19	2	0	143	42.1	113	80	164	1	0	0	0	0	0	0	0	0	0	0	0	0	1	1	0	0	0.96	40.2	12.2	535	0	2	1	0	0	1	1	1	0	0	0	0	0	2	0	17.28	1.8	3
239	69	0	19	2	0	151.2	65	99	73	72	0	0	1	0	0	0	0	0	0	0	1	0	0	0	0	0	0	0.59	75.8	11.9	58	0	1	0	0	0	3	0	1	0	0	0	0	1	2	0	13.63	2.45	2
240	65	1	20	3	0	165	84.8	124	84	72	1	1	1	1	1	0	1	0	1	0	1	0	1	0	0	1	0	9.1	5.2	13.7	291	0	1	0	0	0	2	0	2	0	0	0	0	0	0	0	17.32	3.88	2
241	54	1	20	3	0	169	65	109	76	88	0	1		0	0	0	0	1	0	0	0	0	0	0	0	1	0	0.61	106	16	21.5	0	1	0	0	0	2	0	2	0	0	0	0	0	0	0	14.32	2.91	1
242	74	1	20	3	0	157	57	150	89	95	1	0	0	0	0	0	0	0	0	0	0	0	0	0	0	0	0	0.72	80.8	13.9	416.4		1	0	0	0	1	1	1	0	0	0	0	0	3	1	20.34	2.61	2
243	62	1	20	3	0	163	65	120	62	54	0	1	1	0	0	0	0	0	0	0	0	0	0	0	0	0	0	1.1	53.5	15.5	5.3	0	1	0	0	0	1	1	1	0	0	0	1	0	2	0	10.86	3.57	1
244	79	0	20	3	0	145.5	58.4			99	1	1	1	0	0	0	0	0	0	0	0	1	0	0	0	0	0	0.45	89.3	12.7	84.4	0	1	0	0		2	0	2	0	0	0	0	0	3	1	11.58	2.49	1
245	85	1	20	3	0	160	45	74	43	39	0	0	0	1	0	0	0	0	0	0	0	0	0	0	0	0	0	8.23	5.4	10.6	642.4	1	1	0	0	1	2	0	1	0	0	0	0	0	0	0	12.84	2.24	1
246	41	1	20	3	0	173	98	114	92	102	1	0	1	0	1	0	1	1	0	0	0	0	0	0	0	0	0	0.79	86.5	14.3	59.5	0	1	0	0	0	1	1	2	0	0	0	0	0	2	0	27.87	2.12	2
247	86	0	20	3	0	153	39.8	84	34	39	0	0	0	0	0	0	0	0	0	0	0	0	0	0	0	0	0	0.77	53.1	9.8	240.2	0	1	0	0	1	2	0	2	0	0	0	0	0	0	0	19.84	2.72	1
248	68	1	20	3	0	159.7	61.2	108	49	88	1	1	1	1	1	0	0	0	1	1	1	1	1	1	0	1	0	7.11	7.8	14.2		0	1	0	0	0	2	0	3	1	1	0	0	0	2	0	10.31	3.34	3
249	91	1	20	3	0	155	59.6	185	75	69	1	1	0	0	0	0	0	0										0.95	56.2	9.1	915	0	1	0	0	0	1	1	1	0	0	0	0	0	3	1	9.7	2.26	2
250	71	1	20	3	0	167	72	213	107	78	0	1	0	0	0	0	0	1	0	0	0	0	0	0	0	1	0	0.81	71.9	11.2	87.9	0	1	0	0	0	1	1	2	0	0	0	0	0	0	0	16.7	2.28	1
251	75	1	20	3	0	165	69	114	90	43	1	0	1	0	1	0	1	0	0	0	1	1	0	1	0	0	0	1.22	47.8	12	192.2	0	1	0	0	0	2	0	1	0	0	0	0	0	0	0	19.99	1.72	2
252	63	0	20	3	0	146	62	126	78	86	1	1	0	0	0	0	0	0	0	0	0	1	0	1	0	1	0	0.42	112.8	12.2	306.7	1	1	0	0	0	1	1	3	1	0	0	1	0	3	1	6.12	1.93	1
253	66	1	20	3	0	166	65	142	82	78	1	0	0	0	0	0	0	0	0	0	0	1	0	1	1	0	0	1.72	32.2	12.2	35.9	0	1	0	0	0	2	0	1	0	0	0	0	0	0	0	9.76	2.95	1
254	51	1	20	3	0	162	72	207	109	85	1	1	1	0	0	0	0	1	0	0	1	0	0	0	0	1	0	0.56	118.4	16.5	86.8	0	1	0	0	0	1	1	3	1	0	0	0	0	2	0	15.74	3.83	3
255	85	0	20	3	0	159	61	149	66	73	1	1	1	0	1	0	0	0	1	0	1	0	0	1	1	0	0	0.65	64.2	13.1	74.3	0	1	0	0	0	1	1	2	0	0	0	0	1	0	0	19.15	1.88	2
256	76	1	20	3	0	155	56.2	164	121	57	1	0	1	0	0	0	0		0	0	0	1	0	0	1	0	0	0.83	68.6	13.3	49.3	0	1	0	0	0	1	1	2	0	0	0	0	0	0	0	8.78	2.6	2
257	56	1	21	3	0	173	77	111	64	78	0	1	1	0	0	0	0	1	0	0	0	0	0	0	0	0	0	0.77	81.3	13.8	9.4	0	1	0	0	0	2	0	1	0	0	0	0	0	0	0	28.07	1.83	2
258	66	1	21	3	0	173	66.2	148	78	80	1	1	1	0	1	0	1	1	1	0	1	1	1	0	0	1	0	0.88	61.7	13.7	648.1		2	1	0	0	1	1	2	0	0	0	0	1	2	0	20.27	2.68	2
259	40	1	21	3	0	173	100	129	94	105	1	0	1	0	0	0	0	1	0	0	0	0	0	0	0	0	0	1.01	66.6	17.1	4.1	0	1	0	0	0	1	1	2	0	0	0	0	0	0	0	12.88	2.45	1
260	51	1	21	3	0	171	86	153	97	53	1	1	0	0	0	0	0	1	0	0	1	0	0	0	0	1	0	0.95	66.4	17.4	8.3	0	1	0	0	0	2	0	2	0	0	0	0	0	1	0	20.32	4.38	3
261	83	0	21	3	0	139	49.2	127	61	74	1	0	1	1	0	0	0	0	0	1	0	1	1	1	0	0	0	8.04	4.1	12.3	3443.4	0	2	1	0	0	2	0	3	1	1	0	0	0	2	0	11.4	3.5	2
262	61	0	21	3	0	150	55	89	66	88	1	0	1	0	0	0	0	0	0	0	0	0	0	0	0	0	0	1.03	42.7	12.9	447.1	0	3	1	1	1	2	0	3	1	0	0	0	1	1	0	16.51	3.23	3
263	70	1	21	3	0	160	69.6	210	128	66	1	0	0	0	0	0	0	0	0	0	0	0	1	1	0	0	0	1.14	49.7	16.7	22.7	0	1	0	0	0	2	0	2	0	0	0	0	0	0	0	12.1	2.38	2
264	44	1	21	3	0	168	68	118	74	66	1	0	1	0	0	0	0	1	0	0	0	0	0	0	0	0	0	0.8	83.6	14.7	13.4	0	1	0	0	0	2	0	1	0	0	0	0	0	0	0	9.38	2.75	2
265	78	1	21	3	0	158	58	146	64	84	1	0	1	0	0	0	0	1	0	0	0	0	0	0	0	0	0	0.92	60.9	15.8	749.8	0	1	0	0	0	1	1	1	0	1	0	0	0	3	1	12.88	3.05	2
266	63	1	21	3	0	161	62	129	69	72	1	0	0	0	0	0	0	1	0	0	0	1	0	1	0	0	0	0.51	123.4	13.8	163.7	0	1	0	0	0	2	0	3	1	0	0	0	0	3	1	14.02	3.99	1
267	62	1	21	3	0	163	57	172	118	72	0	0	0	0	0	0	0	1	0	0	0	0	0	0	0	0	0	0.91	65.8	15.9	24.5	0	1	0	0	0	1	1	3	1	0	0	0	0	2	0	25.72	2.07	2
268	80	1	21	3	0	161	62.1	106	66	61	0	0	0	0	0	0	0	1	0	0	0	0	0	0	0	0	0	1.01	54.6	12.9	39.4	0	1	0	0	0	2	0	1	0	0	0	0	0	1	0	13.96	1.93	2
269	67	0	21	3	0	150	68.6	181	105	94	1	0	0	0	0	0	0	0	0	0	0	0	0	1	0	0	0	0.5	64.4	12.8	240.6	0	1	0	0	0	1	1	1	0	0	0	0	1	0	0	12.92	3.18	2
270	42	0	21	3	0	156	35	77	61	42	0	0	1	0	0	0	0	1	0	0	0	0	0	0	0	0	0	0.5	104.7	11.8	107.7	0	3	1	0	1	2	0	1	0	0	0	0	0	0	0	33.47	2.06	1
271	50	1	21	3	0	171	71	164	112	70	1	0	0	0	0	0	0		0	0	0	0	0	0	0	0	0	0.65	101.1	13.9	20.6	0	1	0	0	0	1	1	1	0	0	0	1	0	0	0	10.82	2.84	1
272	49	1	21	3	0	170	68	158	101	120	1	0	1	0	0	0	0	1	0	0	0	0	0	0	0	0	0	0.61	109	16	5	0	1	0	0	0	3	0	1	0	0	0	0	0	2	0	9.16	2.14	1
273	73	1	21	3	0	162	54	110	56	78	1	0	1	0	0	0	0	0	0	0	0	0	0	0	0	0	0	0.87	65.9	14	377.3	1	1	0	0	0	3	0	1	0	0	0	0	1	0	0	13.37	2.58	2
274	51	0	21	3	0	162	96.1	146	100	96	0	1	1	0	0	0	0	1	0	0	0	0	0	0	0	0	0	0.53	92.9	11.7	269.9	0	1	0	0	0	1	1	1	0	0	0	0	0	0	0	21.18	2.25	1
275	84	0	21	3	0	150	53	94	50	42	0	0	0	0	0	0	0	0	0	0	0	0	0	0	0	0	0	0.71	58.5	10.7	374	0	1	0	0	0	2	0	1	0	0	0	0	0	0	0	15.05	1.92	1
276	89	1	21	3	0	150	40	148	94	58	1	0	1	0	1	0	1	0	1	0	1	0	1	1	0	0	0	0.95	56.6	13.4	1962.9	0	1	0	0	0	1	1	1	0	0	0	0	1	3	1	6.56	2.65	1
277	73	1	22	3	0	166	65	124	73	67	1	0	1	0	1	0	1	0	1	0	1	1	0	0	0	0	0	0.74	95.5	10.8	76.4	0	1	0	0	0	2	0	1	0	0	0	0	0	1	0	19.12	2.75	1
278	74	0	22	3	0	145	40	82	46	38	0	0	0	0	0	0	0	0	0	0	0	0	0	0	1	0	0	0.8	46.2	12.9	525.7	0	1	0	0	1	2	0	1	0	0	0	0	0	0	0	14.06	2.67	1
279	66	1	22	3	0	172	71	150	83	62	1	0	1	0	0	0	0	0	1	0	1	0	0	0	0	0	0	0.8	74.4	14.6	10.3	0	1	0	0	0	3	0	2	0	0	0	0	0	3	1	15.92	1.93	1
280	65	1	22	3	0	171	63.6	108	75	65	1	0	1	0	1	0	1	0	0	1	1	1	1	1	0	0	0	1.06	50.2	12.8	20.5	0	1	0	0	0	1	1	1	0	0	0	0	0	0	0	11.76	2.33	2
281	78	1	22	3	0	167	51	128	60	88	0	1	0	0	0	0	0	1										0.65	89	12.8	219.4	1	1	0	0	0	1	1	1	0	0	0	0	1	0	0	9.57	1.99	1
282	68	1	22	3	0	170	52			0	0	1	0	0	0	0	0	0	0	0	0	0	0	0	0	0	0	1.22	46.5	13.5	338	0	3	1	1	1	1	1	1	0	0	0	0	0	0	0	8.7	3.02	1
283	81	1	22	3	0	167	63	106	73	101	1	1	0	0	0	0	0	0	0	0	0	1	0	1	0	0	0	1.35	39.6	10.9	241.2	1	1	0	0	0	1	1	1	0	0	0	0	0	0	0	14.47	2.31	1
284	77	0	22	3	0	147	40.5	112	76	78	1	1	1	1	0	0	0	0	1	0	1	1	0	1	1	1	0	0.52	5.3	10.6		0	1	0	0	1	1	1	2	0	0	0	1	0	3	1	10.71	3.52	1
285	88	0	22	3	0	147	54	203	93	73	1	1	0	0	0	0	0	0	0	0	0	1	0	1	0	0	0	0.87	46.2	11.6	305.5	0	1	0	0	0	1	1	1	0	0	0	0	0	0	0	10.18	1.93	2
286	91	1	22	3	0	161.1	54.5	151	106	93	1	0	0	0	0	0	0	0	0	0	0	1	0	1	0	0	0	1.44	35.7	11.8	2776.8	0	2	1	0	0	1	1	1	0	0	0	1	1	0	0	19.27	2.63	2
287	67	1	22	3	0	163	68	117	58	57	1	0	0	0	0	0	0	1	0	0	0	0	0	0	0	0	0	0.91	64.3	13.8	226.1	0	3	1	0	0	2	0	1	0	0	0	0	0	0	0	25.86	3.09	2
288	90	1	22	3	0	155	50	126	87	98	1	0	0	0	0	0	0	0	0	0	0	0	0	1	0	0	0	1.71	39	12.9	183.8	0	1	0	0	0	1	1	1	0	0	0	0	1	1	0	10.59	2.56	1
289	48	1	22	3	0	172	80	122	83	80	0	1	0	0	0	0	0	1	0	0	0	0	0	0	0	0	0	0.87	74.4	12.2	156	0	1	0	0	0	1	1	3	1	0	0	0	1	0	0	17.28	2.38	1
290	70	1	22	3	0	165	70	160	70	80	1	1		0	0	0	0	1										2.34	22.6	13.7	62.2	0	1	0	0	0	1	1	3	1	0	0	0	0	0	0	7.26	1.73	2
291	66	1	22	3	0	163	68	156	109	117	1	0	1	0	0	0	0	1										0.62	98.3	15.4	572.4	0	2	1	0	0	1	1	2	0	0	0	0	1	0	0	14.53	2.48	2
292	80	0	22	3	0	148	52	108	66	78	1	0	0	0	0	0	0	0	0	0	0	1	0	0	0	0	0	0.87	47.5	10.6	35.5	0	3	1	0	0	1	1	2	0	1	1	0	1	1	0	7.58	3.67	2
293	68	1	22	3	0	160	62.2	165	95	99	1	1	1	0	0	0	0	1	0	0	0	0	0	0	0	1	0	0.87	64.1	14.2	9.2	0	1	0	0	0	1	1	1	0	0	0	0	0	1	0	15.32	2.9	2
294	84	1	22	3	0	155	40	50	39	99		0	1	0	0	0	0	1	0	0	1	0	0	0	0	0	0	1.01	53.8	12.2	51.4	0	3	1	0	1	1	1	2	0	1	1	0	1	2	0	11.96	4	2
295	76	1	22	3	0	163	72	128	78	74	1	0	1	0	1	0	1	0	0	0	1	1	1	0	0	0	0	1.05	53.1	16.1	174.2	0	1	0	0	0	1	1	1	0	1	1	0	1	2	0	25.83	2.44	1
296	69	1	22	3	0	161	61	156	60	113	1	1	0	0	0	0	0	1	0	0	0	0	0	0	0	0	0	1.55	35.6	15	706.4	0	3	1	0	1	1	1	2	0	1	1	1	1	1	0	21.18	1.79	1
297	52	1	22	3	0	165	64.8	173	79	93	1	0	0	0	0	0	0	1	0	0	0	0	0	0	0	0	0	0.57	115.4	16.6	77.8	0	1	0	0	0	1	1	1	0	0	0	0	0	0	0	14.84	2.34	1
298	82	1	22	3	0	161	58	140	80	78	1	1	1	0	0	0	0	0	0	0	1	0	0	0	0	1	0	0.8	69.9	13.4	12.3	0	1	0	0	0	1	1	3	1	0	0	0	1	0	0	8.66	1.97	2
299	69	1	22	3	0	173.2	75.1	121	85	45	1	0	0	0	0	0	0	0	0	0	0	0	0	1	0	0	0	1.24	45.1	15.5	29.8	0	1	0	0	0	2	0	2	0	0	0	0	0	0	0	11.12	2.52	1
300	67	1	23	3	0	178	75	141	82	55	1	0	0	0	0	0	0	1	0	0	0	1	0	0	0	0	0	0.86	57.4	13.9	61.3	0	1	0	0	0	2	0	1	0	0	0	0	0	3	1	11.06	3.77	3
301	65	1	23	3	0	175	75	141	78	83	1	0	1	0	0	0	0	0	0	0	0	0	0	0	0	0	0	0.86	69	15.8	12.3	0	1	0	0	0	1	1	1	0	0	0	0	1	1	0	23.22	2.5	2
302	72	0	23	3	0	142	55	154	87	87		0	0	0	0	1	0	0	1	0	0	0	0	0	0	1	0	0.41	111.4	13.8	39.3	0	1	0	0	0	1	1	1	0	0	0	0	0	0	0	10.5	3.02	2
303	78	1	23	3	0	168	68	169	100	90	1	0	0	0	0	0	0	0										0.71	80.8	13.6	24.9	0	1	0	0	0	2	0	2	0	0	0	0	0	0	0	13.6	3.81	3
304	72	1	23	3	0	161	74.5	129	44	86	1	1	1	0	1	0	1	0	1	1	1	1	1	1	1	0	0	1.03	55	13.5	405	0	1	0	0	0	2	0	1	0	0	0	0	0	2	0	30.6	3.28	1
305	55	1	23	3	0	178	70	182	109	64	1	0	1	0	0	0	0	0	0	0	0	0	0	0	0	0	0	0.79	79.5	16.4	16.8	0	1	0	0	0	1	1	1	0	0	0	0	0	0	0	24.46	2.25	1
306	71	1	23	3	0	162	73.2	175	92	76	1	1	1	0	0	0	0	1	0	0	0	0	0	0	0	0	0	0.8	72.9	13.9	265.9	0	3	1	0	0	1	1	2	0	0	0	0	0	0	0	14.3	3.28	1
307	84	0	23	3	0	147	45	169	73	72	1	1	0	1	0	0	0	0	1	0	0	1	0	1	0	0	0	10.02	3.2	11.8	1542.6	0	1	0	0	0	2	0	3	1	1	0	0	0	3	1	15.79	2.88	1
308	64	1	23	3	0	176	82	100	50	60	1	1	1	0	0	0	0	1	0	1	1	0	0	1	0	1	0	0.98	60.1	16.7	4	0	1	0	0	0	3	0	2	0	1	0	0	0	0	0	13.84	2.25	1
309	92	0	23	3	0	147	49.7	171	84	95	1	0	0	0	1	0	1	0	1	0	0	0	1	1	0	0	0	0.75	53.6	12.1	1078.4	0	1	0	0	0	2	0	2	0	0	0	0	1	2	0	9.51	4.29	3
310	79	0	23	3	0	153	70.6	118	103		1	0	1	0	1	0	0	0	0	0	1	1	0	1	1	0	0	0.88	40	10.8	34.5	0	1	0	1	1	3	0	2	0	0	0	1	0	0	0	9.19	2.69	2
311	87	0	23	3	0	141	43.1	217	92	80	1	1		0	0	0	0	0	0	0	0	0	0	1	0	0	1	0.51	83.1	8.9	121.4	0	1	0	0	0	2	0	3	1	0	0	0	0	0	0	12.21	1.92	1
312	57	1	23	3	0	160	72.5	170	110	90	1	1	1	0	0	0	0	0	0	0	0	0	0	1	0	0	0	0.64	99.1	15.7	4	0	1	0	0	0	3	0	1	0	0	0	0	1	0	0	20.7	2.25	2
313	78	1	23	3	0	165	85	119	69	70	1	1	0	0	0	0	0	0	0	0	0	1	0	1	0	0	0	0.99	56.2	13.9	71.5	0	1	0	0	0	2	0	1	0	0	0	0	0	1	0	17.8	2.97	2
314	67	1	23	3	0	165	99	142	82	92	1	1	1	0	1	0	1	0	1	1	1	0	1	0	0	1	0	0.85	69.3	12.9	94.2	0	1	0	0	0	2	0	1	0	0	0	0	0	0	0	11.14	2.04	1
315	90	0	23	3	0	158	44	118	58	50	1	1	1	0	0	0	0	0	0	0	1	0	0	1	0	1	1	1.02	38.6	10.3	1476.2	0	1	0	0	0	2	0	2	0	0	0	0	0	0	0	21.85	2.14	2
316	66	1	23	3	0	161	67	142	93	71	1	0	1	0	0	0	0	1	0	0	0	0	0	0	0	0	0	0.61	100.1	13	230.4	0	1	0	0	0	1	1	1	0	0	0	0	1	3	1	24.2	2.78	2
317	65	1	23	3	0	173	82	170	102	102	1	0	0	0	0	0	0	0	0	0	0	1	0	0	0	0	0	0.97	60.5	12.7	31.5	0	1	0	0	0	1	1	2	0	1	1	0	1	3	1	18.43	3.95	2
318	64	0	23	3	0	156	59	136	79	69	0	0	1	0	0	0	0	0	0	0	0	0	0	0	0	0	0	0.58	78.9	13.8	27.3	0	1	0	0	0	1	1	1	0	0	0	0	0	0	0	24.99	2.28	1
319	87	0	23	3	0	150	50	200	98	110	1	1		0	0	0	0	0										1.06	37.5	11.1	503.7	0	3	1	1	1	1	1	2	0	1	1	0	1	3	1	23.2	2.35	2
320	80	0	23	3	0	140	38.8	118	57	54	0	0	0	0	0	0	0	0	0	0	0	0	0	0	0	0	0	0.61	70	12.3	34.6	0	1	0	0	0	2	0	3	1	0	0	0	0	2	0	6.83	2.41	1
321	43	1	23	3	0	165	75	189	132	97	1	1	1	0	0	0	0	1	0	0	0	0	0	0	0	0	0	0.67	102.2	15.3	66.9	0	1	0	0	0	1	1	1	0	0	0	0	0	0	0	13.69	3.11	2
322	65	1	23	3	0	166	59	133	84	60	1	0	0	0	0	0	0	1	0	0	0	0	0	1	0	0	0	0.61	100.5	17.1	61.7	0	1	0	0	0	3	0	1	0	0	0	0	1	0	0	21.44	2.41	2
323	88	1	23	3	0			89	73	87	1	0	1	0	1	0	1	0	1	1	0	0	0	1	0	0	0	1.18	39.1	11.7	271.1	0	3	1	1	1	1	1	3	1	1	1	0	1	0	0	14.12	2.16	1
324	73	0	23	3	0	150	35.8	114	52	55	1	0	0	0	0	0	0	0	0	0	0	1	0	0	0	0	0	1.77	30.1	10.4	530.2	0	3	1	0	1	2	0	3	1	0	0	0	0	0	0	24.46	3.72	1
325	60	1	24	4	0	170	68	164	130	71	1	0	1	0	0	0	0	1	0	0	0	0	0	0	0	0	0	0.69	89.9	15.6	129.7	0	1	0	0	0	1	1	1	0	0	0	0	1	2	0	19.95	2.75	2
326	51	1	24	4	0	175	76	210	108	48	1	0	0	0	0	0	0	1	1	0	0	0	0	0	0	0	0	0.97	64.9	15	46.1	0	1	0	0	0	1	1	1	0	0	0	0	0	0	0	7.9	3.26	3
327	98	1	24	4	0	156	56	92	54	70	0	0	1	0	1	0	1	0	1	0	1	0	0	0	0	0	0	1.79	27.5	12	213.9	0	1	0	0	0	2	0	2	0	0	0	0	0	2	0	20.94	2.9	2
328	66	1	24	4	0	170	65	122	69	53	1	0	0	0	0	0	0	1	1	1	0	1	0	1	0	0	0	0.65	93.4	14.4	150.3	0	1	0	0	0	2	0	3	1	0	0	0	0	2	0	16.25	3.51	2
329	66	1	24	4	0	162	48.2			86	1	0	0	0	0	0	0	1	0	0	0	1	0	1	0	0	0	0.77	77.6	13	91.9	1	1	0	0	0	1	1	2	0	0	0	0	0	2	0	34.61	2.77	2
330	56	1	24	4	0	169	84	174	94	103	1	0	1	0	0	0	0	1	0	0	0	0	0	0	0	0	0	0.67	94.7	14.8	154	0	1	0	0	0	3	0	1	0	0	0	0	1	1	0	8.56	1.93	1
331	62	1	24	4	0	168.4	75.3			56	1	0	0	0	0	0	0	1	0	0	0	1	0	0	0	0	0	0.79	76.8	13.7	26.6	0	1	0	0	0	2	0	1	0	0	0	0	0	3	1	12.48	2.88	2
332	77	1	24	4	0	163	64	77	36	30	1	1	0	0	0	0	0	0	0	0	0	1	0	0	0	1	0	1.15	47.9	13	184.4	0	1	0	0	1	2	0	2	0	0	0	0	0	2	0	17.21	2.52	1
333	59	1	24	4	0	163	84.85	118	87	70	1	1	1	0	0	0	0	0	0	0	1	1	0	1	0	1	0	0.82	75.8	14.9	4	0	1	0	0	0	3	0	1	0	0	0	0	0	0	0	15.82	5.22	2
334	59	1	24	4	0	167	70	75	57	50	1	0	0	0	0	0	0	0	0	0	0	0	0	0	0	0	0	0.99	84.9	13.4	112.1	0	3	1	0	0	2	0	3	1	0	0	0	0	0	0	9.75	3.04	1
335	49	1	24	4	0	170	76	148	86	64	1	1	1	1	0	0	0	1	0	0	1	0	0	0	0	1	1	0.56	119.7	16.8	142.2	1	1	0	0	0	2	0	1	0	0	0	0	0	0	0	10.25	3.08	1
336	57	0	24	4	0	154	50	83	56	112	0	1	0	0	0	0	0	1	0	0	0	0	0	0	0	1	1	0.38	129.5	14.2	588.5	1	1	0	0	1	3	0	3	1	0	0	0	1	0	0	13.38	2.34	2
337	57	1	24	4	0	175	78	180	118	102	1	0	0	0	0	0	0	0	0	0	0	1	0	0	0	0	0	1.04	55.9	14.7	89.5	0	1	0	0	0	1	1	2	0	0	0	0	1	2	0	8.35	3.12	1
338	74	1	24	4	0	161	65	135	67	78	0	0	0	0	0	0	0	0	0	0	0	0	0	0	0	0	0	0.54	110.7	14.5	129.8	0	1	0	0	0	1	1	1	0	0	0	1	0	0	0	27.33	3.23	1
339	77	1	24	4	0	164.5	50	105	74	59	1	1	1	0	1	0	0	0	1	1	1	0	0	0	0	1	0	1.45	37.1	12.9	517.5	0	1	0	0	0	1	1	2	0	0	0	1	0	0	0	24.27	1.19	1
340	59	1	24	4	0	171	75	145	96	54	1	0	1	0	0	0	0	1	0	0	1	0	1	1	0	0	0	0.69	90.3	16.1	46.5	0	1	0	0	0	1	1	1	0	0	0	0	1	2	0	19.53	3.42	2
341	67	1	24	4	0	162	70	112	78	106	1	1	1	0	0	0	0	1	0	0	1	1	0	1	0	1	0	1.98	27.5	12.8	1418.6	0	2	1	0	0	3	0	2	0	0	0	0	0	0	0	26.72	2.7	2
342	79	0	24	4	0	146	46.3	117	99	73	0	0	1	0	0	0	0	0	0	0	0	0	0	0	0	0	0	0.61	70.3	12.5	48.9	0	1	0	0	0	1	1	1	0	0	1	0	1	1	0	11.67	3.27	2
343	79	1	25	4	0	169	75	127	88	74	1	0	1	0	0	0	0	0	0	0	0	0	0	0	0	0	0	0.64	90.2	12.7	27.5	0	1	0	0	0	2	0	2	0	0	0	0	0	1	0	9.33	2.75	2
344	78	1	25	4	0	161	72	113	82	106	1	0	1	0	0	0	0	0	0	1	1	0	0	1	0	0	0	0.65	82.1	12	519.9	0	1	0	0	0	1	1	2	0	0	0	0	0	0	0	13.07	2.14	1
345	68	0	25	4	0	149	74.9	190	110	122	1	1	1	0	0	0	0	0	0	0	1	1	0	0	0	1	0	0.59	76.1	14.9	1035.7	0	3	1	0	1	1	1	1	0	0	0	0	0	1	0	9.11	1.66	1
346	85	1	25	4	0	160	53.5	125	42	51	1	1	0	0	1	0	1	1	0	0	1	1	0	1	1	0	0	3.2	15.2	9.3	2262.7		1	0	0	0	2	0	3	1	0	0	0	0	0	0	23.54	2.22	1
347	73	1	25	4	0	155.2	62.4	138	83	71	0	0	1	0	0	0	0	0	0	0	0	0	0	0	0	0	0	0.68	86.4	15.3	18.8	0	1	0	0	0	1	1	1	0	0	0	0	0	0	0	17.02	3.4	3
348	75	1	25	4	0	170	97.7	133	80	81	1	1	1	0	1	0	0	0	1	1	1	1	0	0	0	1	0	0.76	74.8	15.7	34.9	0	2	1	0	0	2	0	3	1	0	0	0	0	0	0	55.69	2.04	3
349	87	1	25	4	0	140	37	100	75	89	1	0	1	0	0	0	0	0	1	0	0	0	0	0	0	0	0	0.85	47.5	11.9	1308.6	0	2	1	0	0	1	1	1	0	0	0	0	0	0	0	19.06	2.46	2
350	54	1	25	4	0	175	80	98		78	1	1	1	0	0	0	0	1	0	0	0	1	0	1	0	0	0	0.92	67.6	16.2	14.9	0	3	1	0	1	1	1	3	1	1	1	0	1	0	0	9.5	2.61	2
351	69	1	25	4	0	167	72	113	68	72	1	0	1	0	0	0	0	1	0	0	0	1	0	1	0	0	0	1.18	48	14.8	24.8	0	1	0	0	0	2	0	3	1	0	0	0	0	0	0	10.83	3.17	1
352	72	1	25	4	0	158	56.8	162	128	141	1	0	1	0	1	0	0	0	1	1	1	1	1	1	0	0	0	0.7	94.2	11.4	722.6	0	2	1	0	0	1	1	2	0	0	0	0	0	0	0	23.5	1.4	2
353	47	1	25	4	0	173	66.4	117	67	87	1	1	1	1	0	0	0	0	0	1	0	0	0	1	0	0	0	10.66	4.8	11	871.8	1	1	0	0	0	1	1	3	1	0	0	0	0	1	0	20.7	2.04	1
354	81	0	25	4	0	145	45	143	77	77	1	1	1	0	0	0	0	0	0	0	0	1	0	0	0	1	0	0.77	54.1	12.3	364.9	0	1	0	0	0	1	1	1	0	0	0	0	1	3	1	9.11	2.43	3
355	69	1	25	4	0	168	55	105	73	102	0	1	0	0	0	0	0	1										1.63	33.7	14.3	86.6	0	3	1	0	0	3	0	2	0	0	0	0	1	0	0	21.16	1.43	2
356	66	0	25	4	0	155	50	82	38	58				0	0	0	0	0										0.74	59.9	13.6	21.9	0	3	1	0	1	5	0	1	0	1	1	0	1	0	0	13.32	3.58	1
357	48	1	25	4	0	170	84	149	97	60	1	0	1	0	0	0	0	1	0	1	0	1	0	0	0	0	0	1.73	35.1	15.2	9.5	0	1	0	0	0	2	0	2	0	0	0	0	0	0	0	23.36	4.76	2
358	91	0	25	4	0	138	42	144	87	86	1	0	1	0	0	0	0	0	0	0	1	1	0	1	0	0	0	0.84	47.5	9.3	539		1	0	0	0	1	1	2	0	0	0	0	1	3	1	23.69	2.56	1
359	58	1	25	4	0	176	75	188	130	78	1	0	1	0	0	0	0	1	0	0	0	0	0	0	0	0	0	0.84	73.2	15.9	29.3	0	1	0	0	0	1	1	1	0	0	0	0	0	0	0	12.36	2.38	1
360	69	1	25	4	0	172	70	167	110	90	1	0	1	0	0	1	1	0	1	0	1	1	0	1	0	0	0	0.65	92.2	16.1	48.5	1	1	0	0	0	2	0	2	0	0	0	0	0	3	1	25.03	2.1	1
361	69	1	25	4	0	173	65	98	76	84	0	0	0	0	0	0	0	1	0	0	0	0	0	0	0	0	0	0.82	71.5	13	286.5	0	3	1	0	1	2	0	3	1	0	0	0	0	0	0	10.68	3.03	2
362	54	1	25	4	0	165	66.9	121	77	63	0	0	1	0	0	0	0	1	0	0	0	0	0	0	0	0	0	0.84	74.7	13.1	6.1	0	1	0	0	0	2	0	1	0	1	0	0	0	0	0	10.33	3.41	1
363	83	0	25	4	0	147	47	76	46	103				0	0	0	0											1.05	38.2	8.6	1018.7		3	1	0	1	2	0	3	1	0	0	0	0	0	0	19.21	1.85	1
364	70	1	26	4	0	161	60	201	102	135	1	1	1	0	0	0	0	1	1	1							1	0.83	70.3	13.7	358.2	0	2	1	0	0	1	1	2	0	0	0	0	1	0	0	20.39	2.37	1
365	55	1	26	4	0	173	80.9	122	66	46	1	1	0	0	0	0	0	0	0	0	0	0	0	1	0	1	0	1.11	54.8	13.5	122.3	0	1	0	0	0	2	0	2	0	0	0	0	1	1	0	26.13	2.4	1
366	80	1	26	4	0	158	53	98	40	66	1	0	0	0	0	0	0	1	0	0	0	1	0	0	0	0	0	0.86	65.1	10	47.5	0	1	0	0	0	2	0	1	0	0	0	0	0	0	0	17.73	2.3	1
367	82	1	26	4	0	154	54	174	94	55	1	1	0	0	0	0	0	0	1	0	0	0	0	1	0	1	0	0.56	103.3	11.5	294.5	0	1	0	0	0	1	1	2	0	0	0	0	1	2	0	13.71	2.75	1
368	64	1	26	4	0	170	60	105	72	64	0	0	0	0	0	0	0	1	0	0	0	0	0	0	0	0	0	0.63	97.5	13	9.3	0	1	0	0	0	2	0	1	0	0	0	0	0	0	0	29.34	2.99	1
369	80	1	26	4	0	173.2	64.7	150	82	68	1	1	1	0	1	0	1	0	1	1	1	1	1	0	1	1	0	1.04	52.8	12.8	101.9	0	1	0	0	0	2	0	3	1	0	0	0	0	0	0	8.08	3.08	3
370	86	0	26	4	0	145	45	141	83	102	1	0	0	0	0	0	0	0	0	0	0	1	0	1	0	0	0	0.94	42.9	12.9	2377.6	1	1	0	0	0	1	1	2	0	0	0	0	1	0	0	9.49	1.46	1
371	45	1	26	4	0	168	66.5	125	80	87	0	0	0	0	0	0	0	1	0	0	0	0	0	0	0	0	0	0.65		12.6	285.8	0	1	0	0	0	1	1	1	0	0	0	0	0	0	0	9.37	2.65	1
372	73	1	26	4	0	166.6	64.5	151	75	103	1	0	1	0	0	0	0		0	0	1	0	0	0	0	0	0	0.83	69.4	14.7	14.1	0	1	0	0	0	1	1	2	0	0	0	0	1	0	0	45.56	1.95	2
373	83	0	26	4	0	152	41.9	90	60	90	1	0	0	0	0	0	0	0	0	0	0	0	0	1	0	0	0	1.94	19.5	12.8	1050.7	1	2	1	0	0	1	1	3	1	0	0	0	1	2	0	6.61	1.98	3
374	77	1	26	4	0	166	67			138	1	0	0	0	0	0	0	0	0	0	0	0	0	0	0	0	0	0.82	69.3	17.2	1241.4	0	2	1	0	0	1	1	3	1	0	0	0	1	0	0	14.78	1.81	2
375	72	1	26	4	0	163	58	184	98	104	1	1	1	0	0	0	0	0	0	0	0	1	0	1	0	1	1	0.85	67.9	15.3		0	1	0	0	0	2	0	2	0	0	0	0	0	2	0	30.36	3.17	2
376	46	1	26	4	0	172	71.6	107	72	39	0	0	0	0	0	0	0	1	0	0	0	0	0	0	0	0	0	1.08	59.4	15.4	22.9	0	1	0	0	0	2	0	3	1	0	0	0	1	0	0	36.38	2.76	2
377	76	0	27	4	0	156	46	154	93	93	1	0	1	0	0	0	0	0	0	0	0	0	0	1	0	0	0	0.42	106.9	12	474.6		2	1	0	0	1	1	1	0	0	0	0	0	1	0	19.5	1.91	1
378	93	1	27	4	0	165	57.2	104	51	41	1	0	0	0	0	0	0	0	0	0	0	0	0	1	0	0	0	0.95	55.9	14	31.6	0	3	1	0	1	2	0	1	0	0	0	0	0	1	0	18.26	3.32	2
379	68	1	27	4	0	162	60	159	95	110	1	1	1	0	1	0	0	0	1	1	1	1	1	0	1	1	0	1.41	30.8	16.4	534.5	0	2	1	0	0	1	1	1	0	1	0	1	0	3	1	8.68	5.5	1
380	67	0	27	4	0	148	53	148	112	106	1	1	1	0	0	0	0	0	0	0	0	0	0	0	0	0	0	0.36	131.1	15	80.7	0	1	0	0	0	1	1	3	1	0	0	0	0	2	0	28.26	3.23	2
381	58	1	27	4	0	171	71	157	100	71	1	0	1	0	0	0	0	1	0	0	1	1	1	0	0	0	0	0.57	103.9	14.8	20.9	0	1	0	0		1	1	1	0	0	0	0	0	0	0	31.56	2.08	2
382	61	1	27	4	0	172	89	140	100	70	1	1	1	0	0	0	0	1	0	0	0	0	0	0	0	0	0	0.57	110.3	16	44.2	0	1	0	0	0	2	0	1	0	0	0	0	0	0	0	30	3.45	2
383	77	1	27	4	0	153	59	134	71	65	1	1	1	0	1	0	0	0	1	0	1	0	0	1	0	1	0	0.47	127.4	13.7	18.3	0	1	0	0	0	2	0	2	0	0	0	0	0	2	0	11.01	2.82	1
384	75	0	28	4	0	150	56.3	79	56	94	1	0	1	0	0	0	0	0	1	0	1	1	0	1	0	0	0	1.91	20.5	12.6	253.5	0	3	1	0	1	1	1	3	1	0	0	0	0	0	0	22.85	2.39	1
385	84	1	28	4	0	162.5	62.9	104	56	70	0	1	0	0	0	0	0	0	0	0	0	0	0	0	0	1	0	0.76	73.4	12.6	239.4	0	1	0	0	0	1	1	2	0	0	0	0	1	3	1	42.13	2.79	3
386	42	1	28	4	0	169	75	136	85	72	1	1	1	0	0	0	0	0	1	0	0	0	0	0	1	0	0	0.62	112	16.8	46.5	0	1	0	0	0	1	1	3	1	0	0	0	0	0	0	30.25	2.87	2
387	64	0	28	4	0	148	65	212	79	63	1	1	1	0	0	0	0	0	0	0	1	1	1	1	1	1	0	0.59	77.4	14	76.8	1	1	0	0	0	1	1	1	0	0	0	0	1	3	1	19.17	2.23	2
388	73	1	28	4	0	150	43	86	53	119	1	0	0	0	0	0	0	0	0	1	1	1	0	0	0	0	0	1.8	29.8	11.5	1215.7	0	3	1	0	1	1	1	3	1	1	1	0	1	2	0	49.67	2.42	3
389	80	1	28	4	0	155	50	113	43	48	1	1		0	0	0	0	0	0	0	0	0	0	1	0	1	0	1.28	42.1	14	251.5	0	1	0	0	0	3	0	1	0	0	0	0	0	0	0	15.5	1.92	1
390	84	0	28	4	0	150	49.5	80	36	62	1	0	0	0	0	0	0	0	0	0	0	0	0	1	1	0	0	2.22	16.8	10.8	277.7	0	3	1	0	1	2	0	2	0	0	0	0	0	0	0	21.12	2.23	2
391	70	1	28	4	0	162	59	133	88	74	0	0	1	0	0	0	0	0										0.68	87.4	14.7	143.3		1	0	0	0	2	0	2	0	0	0	0	0	0	0	13.7	2.63	1
392	79	1	28	4	0	168	72.5	121	66	65	1	1	1	0	0	0	0	0	0	0	0	1	0	1	0	1	0	1.05	52.5	15.3	463		1	0	0	0	1	1	1	0	0	0	0	1	2	0	17.94	2.13	2
393	83	0	28	4	0	125	46	120	58	66	1	0	1	0	0	0	0	0	0	0	0	1	0	0	1	0	0	1.74	22	10.8	328.6	0	1	0	0	0	2	0	1	0	0	0	0	0	0	0	17.44	2.5	3
394	48	1	28	4	0	171	84	138	80	103	0	1	1	0	0	0	0	1	0	0	0	0	0	0	0	0	0	0.52	130.6	13.4	10.9	0	1	0	0	0	2	0	1	0	0	0	0	0	0	0	14.92	3.09	1
395	81	0	28	4	0	153	70	127	80	125	1	0	1	0	0	0	0	0	0	0	0	1	0	1	0	0	0	0.84	49.2	12.4	1898.8	0	2	1	0	0	1	1	1	0	0	0	0	0	0	0	9.21	2.16	2
396	61	1	28	4	0	173	100	178	104	148	1	1	1	0	0	0	0	0	0	0	1	1	1	1	1	1	0	1.58	36.1	14.7	774.4	0	2	1	0	0	1	1	2	0	0	0	0	0	0	0	9.82	1.42	1
397	63	1	29	4	0	165	74	153	88	92	1	1	1	0	1	0	0	1										0.88	67.9	17.2	14.9	0	1	0	0	0	1	1	3	1	0	0	0	0	0	0	11.66	2.29	2
398	61	1	29	4	0	170	64.6	133	86	71	0	0	1	0	1	0	1	1	0	0	0	0	0	0	0	0	0	0.75	81.7	13.7	10.7	0	1	0	0	0	2	0	1	0	0	0	0	1	0	0	30.56	2.37	1
399	60	1	29	4	0	169	85	124	102	65	0	0	1	0	0	0	0	1	0	0	0	0	0	0	0	0	0	0.98	61.2	16.4	4	0	1	0	0	0	1	1	1	0	0	0	0	0	0	0	17.15	1.89	1
400	78	1	29	4	0	173	68	169	77	70	1	1	1	0	1	0	1	0	1	1	0	1	0	1	0	1	0	1.03	53.8	13.9	79.6	0	1	0	0	0	3	0	3	1	0	0	0	0	3	1	9.2	2.14	1
401	83	1	29	4	0	158	47	100	53	82	1	1	1	1	0	0	0	1	1	1	1	1	1	1	1	0	0	5.94	7.8	12.8	2402.2	0	2	1	0	1	1	1	3	1	0	0	0	0	2	0	21.02	2.86	2
402	73	1	29	4	0	165	56	116	83	89	0	0	0	0	0	0	0	1	0	0	0	0	0	0	0	0	0	0.84	68.5	16.8	401	0	3	1	0	0	1	1	2	0	1	1	0	1	0	0	15.76	2.85	1
403	83	1	29	4	0	160	51.7	119	63	86	1	1	1	1	1	0	1	0	1	1	1	1	1	1	0	0	0	4.43	10.7	10.6	2694.3	0	2	1	0	0	1	1	3	1	1	1	0	1	3	1	15.93	3.3	2
404	66	1	29	4	0	167	58	183	115	103	1	0	0	0	0	0	0	1	0	0	0	0	0	0	0	0	0	0.68	88.9	14.3	48.4	0	1	0	0	0	1	1	1	0	0	0	0	1	0	0	11.7	2.18	2
405	45	1	29	4	0	170	80	120	73	75	1	0		0	0	0	0	1	0	0	0	0	0	0	0	0	0	0.91	72.1	14.6	10	0	1	0	0	0	1	1	2	0	0	0	0	0	2	0	15.44	4.15	2
406	64	1	29	4	0	178	77.5	141	92	59	1	1	1	0	0	0	0	0	0	0	0	1	0	1	0	1	0	1.11	52.5	14.2		0	1	0	0	0	2	0	3	1	1	0	0	0	1	0	12.03	2.41	1
407	84	1	29	4	0	154	55.2	74	52	54	1	0	1	0	1	0	1	0	0	0	0	1	0	0	0	0	0	1.35	39.2	13.3	54.5	0	3	1	0	1	2	0	2	0	1	0	0	0	0	0	8.39	1.75	1
408	70	1	30	4	0	161	66.1	121	87	90	0	1	0	0	0	0	0	0	0	0	0	0	0	0	0	1	0	0.93	62	14.2	273.7	0	1	0	0	0	2	0	2	0	0	0	0	0	0	0	24.83	2.36	2
409	81	1	30	4	0	156	52	92	32	61	0	0	0	0	0	0	0	1	0	0	0	0	0	0	0	0	0	1.56	33.8	11.9	540.1	1	1	0	0	0	2	0	1	0	0	0	0	0	0	0	16.63	2.91	2
410	77	1	30	4	0	170	70	130	82	132	1	1	0	0	0	0	0	1	0	0	0	1	1	1	0	1	0	2.08	27.6	16.9	104.4	0	3	1	1	1	3	0	3	1	0	0	0	0	0	0	17.02	2.78	1
411	65	1	30	4	0	160	44.7	102	48	56	0	0	0	0	0	0	0	0	0	0	0	0	0	0	1	0	0	1.05	53.8	9	149.4	0	1	0	0	0	2	0	2	0	0	0	0	1	0	0	15.78	1.8	1
412	72	1	30	4	0	171	69.4	136	92	61	1	0	0	0	0	0	0	0	0	0	0	1	0	1	0	0	0	0.51	86	13.9	60.7	0	1	0	0	0	2	0	1	0	0	0	0	0	0	0	4.08	1.28	1
413	68	1	30	4	0	180	72	180	82	110	1	1	0	0	0	0	0	1	0	0	0	1	0	0	0	1	0	0.58	105.3	15.7	88.5	0	1	0	0	0	1	1	2	0	0	0	0	1	1	0	19.07	2.41	2
414	89	0	30	4	0	146	46	154	76	90	1	1	0	0	0	0	0	0	0	0	0	0	0	0	0	0	0	0.97	40.9	11.3	220.2	0	1	0	0	0	1	1	1	0	0	0	0	1	1	0	12.35	2.59	2
415	73	0	30	4	0	150	54	106	69	99	1	1	0	1	0	0	0	0	1	0	0	0	1	0	0	0	0	8.99	3.9	11.5	1566.4	0	1	0	0	0	1	1	3	1	0	0	0	0	0	0	10.04	3.3	1
416	85	0	30	4	0	149	38.4	161	83	85	1	0	0	0	0	0	0	0	0	0	0	0	0	0	1	0	0	2.5	14.7	10.4	789.1	0	1	0	0	0	1	1	1	0	0	0	0	0	2	0	11.94	2.5	2
417	97	0	30	4	0	136	48	86	61	63	1	1	0	0	0	0	0	0	0	0	0	1	0	0	1	0	0	1.56	23.7	10.4	146.2	0	2	1	0	1	2	0	2	0	0	0	0	0	0	0	4.96	0.64	2
418	81	0	30	4	0		38	135	77	102	0	1	0	0	0	0	0	0	0	0	0	0	0	0	0	0	0	0.96	27.8	8.4		0	1	0	0	0	2	0	1	0	0	0	0	0	3	1	12.92	2.74	2
419	76	1	30	4	0	168	60	126	86	84	0	0	0	0	0	0	0	0	0	0	0	0	0	0	0	0	0	0.63	92.8	13.7	133.3	0	1	0	0	0	3	0	3	1	0	0	0	0	2	0	25.96	2.43	2
420	45	1	30	4	0	176	69.9	162	104	117	1	0	1	0	1	0	1	1	0	0	0	0	0	0	0	0	0	0.79	84.2	15.9	168.6	0	1	0	0	0	1	1	2	0	0	0	0	0	0	0	25.84	2.3	1
421	81	0	31	4	0	142	44	132	42	75	1	1	0	0	0	0	0	0	0	0	1	1	0	1	1	1	0	1.53	25.5	8.6	210.5	0	1	0	0	0	1	1	2	0	0	0	0	0	2	0	15.94	2.43	2
422	64	1	31	4	0	169	59	98	68	96	1	1	1	0	0	0	0	0	0	0	1	0	0	0	0	0	0	0.82	69.4	13		0	1	0	0	0	2	0	3	1	0	0	0	0	3	1	14.72	2.32	2
423	78	0	31	4	0	152	52	190	117	104	1	1	1	0	0	0	0	0	0	0	1	1	0	1	0	0	0	3.09	12	10	3635.3	0	2	1	0	0	1	1	1	0	0	0	0	1	3	1	24.07	2.02	1
424	75	0	31	4	0	148.5	64				1	0	1	0	0	0	0	0	1	0	0	1	0	1	0	0	0	0.56	74	10.6	24.7	0	3	1	0		2	0	1	0	0	0	1	0	0	0	4.68	1.3	1
425	49	1	31	4	0	181	92	160	98	85	1	0	1	0	0	0	0	1	0	0	0	0	0	0	0	0	0	0.85	78.5	16.1	10	0	1	0	0	0	1	1	1	0	0	0	0	1	3	1	16.13	3.03	1
426	79	1	32	4	0	164	59	132	55	73	1	1	1	0	0	0	0	0	1	0	1	1	0	0	0	0	0	1	55.4	12.8	47.7	0	1	0	0	0	1	1	2	0	0	0	0	0	1	0	24.06	2.89	3
427	85	0	32	4	0	150	52	193	103	72	1	0	1	0	0	0	0	0										0.61	68.8	11.1	116.5	0	1	0	0	0	2	0	2	0	0	0	0	0	0	0	7.7	2.69	2
428	79	1	32	4	0	168	68	122	60	55	1	0	0	0	0	0	0	0	0	0	0	0	0	0	0	0	0	0.87	78.1	13.8	29.1	0	1	0	0	0	2	0	1	0	0	0	0	0	0	0	9.44	3.54	1
429	75	1	32	4	0	165	60	183	119	102	1	0	1	0	0	0	0	0	0	0	0	0	0	0	0	0	0	0.62	94.8	15.8	86.8	0	1	0	0	0	2	0	3	1	0	0	0	0	0	0	7.05	1.9	2
430	81	0	32	4	0	151	45.5	200	80	80	1	0	1	1	0	0	0	0	0	0	0	1	0	1	1	0	0	9.59	3.4	11.2	320.8	0	1	0	0	0	3	0	1	0	0	0	0	0	0	0	6.15	3.07	3
431	77	1	32	4	0	167	60	98	61	102	1	0	0	0	0	0	0	1	0	0	0	1	0	1	0	0	0	1.93	27.2	14.5	676.3	1	1	0	0	0	1	1	2	0	0	0	0	0	0	0	10.04	1.78	3
432	74	1	32	4	0	162	66	117	88	88	1	0	0	0	0	0	0	0	0	0	0	1	0	1	0	0	0	1.31	42	14.2	33.9	0	3	1	0	1	1	1	1	0	1	1	0	1	0	0	15.49	3.52	2
433	77	1	32	4	0	154.2	59	106	58	74	1	1	0	0	0	0	0	0	0	1	0	0	0	1	0	1	0	0.93	60.4	13.4	51.3	0	1	0	0	0	2	0	2	0	0	0	0	0	3	1	17.86	3.69	2
434	88	1	32	4	0	153	59.9	129	69	90	1	0	0	0	0	0	0	0	0	0	0	0	0	1	0	0	0	0.68	81.8	12.9	129.4	1	1	0	0	0	1	1	1	0	0	0	0	1	3	1	42.11	2.31	2
435	84	1	33	5	1	160	52	148	69	98	1	0	1	0	0	0	0	1	0	0	0	1	0	1	0	0	0	0.59	96.9	13	91.8	0	1	0	0	0	1	1	1	0	0	0	0	0	1	0	48.41	1.43	2
436	70	1	33	5	1	173	67.8			51	1	0	0	1	1	0	1	1	1	1	1	1	1	0	1	0	0	11.68	3.9	11.1		0	1	0	0	0	2	0	2	0	0	0	0	0	0	0	9.5	4.06	2
437	66	1	33	5	1	163	73.5	216	116	96	1	1	1	1	1	0	1	0	1	1	1	1	1	1	0	1	0	10.71	4.4	11.4	484	0	1	0	0	0	2	0	3	1	0	0	0	0	2	0	16.37	3.47	2
438	61	1	33	5	1	172	66.7	186	101	81	1	1	1	0	0	0	0	1	0	0	1	1	0	0	0	1	0	0.92	65.3	14.6	22.9	0	1	0	0	0	2	0	2	0	0	0	0	1	0	0	14.44	2.23	3
439	84	0	33	5	1	140	40	171	99	72	1	0	0	0	0	0	0	0	0	0	0	0	0	0	0	0	0	0.65	64.4	11.5	1255.1	0	1	0	0	0	1	1	1	0	0	0	0	0	0	0	30.89	0.55	1
440	81	1	33	5	1	178	65	118	63	129	0	1	0	0	0	0	0	1	0	0	0	0	0	0	1	1	0	2.27	22.4	13.2	2199.5	0	3	1	0	0	1	1	3	1	0	0	0	0	1	0	16.71	2.8	1
441	47	1	33	5	1	176	84	126	94	92	0	1	0	0	0	0	0	1	0	0	0	0	0	0	0	0	0	3.69	96.4	15.1	116.2	1	1	0	0	0	2	0	1	0	0	0	0	0	0	0	8.17	2.44	1
442	61	1	33	5	1	187	61	101	73	100	1	0	0	0	0	0	0	1	0	0	0	0	1	0	0	0	0	0.69	109.7	14.6	222.5	0	1	0	0	0	1	1	1	0	0	0	0	0	0	0	44.57	2.96	2
443	69	1	33	5	1	178	82				0		0	0	0	0	0	0	0	0	0	0	0	0	0	0	0	1.29	43.6	12.4	67.2	0	3	1	1	0	1	1	1	0	0	0	0	0	0	0	15.23	3.39	1
444	58	1	33	5	1	171	79	179	81	98	1	1	0	0	0	0	0	1	0	0	0	1	0	1	0	1	1	2.18	25.8	13.9	332.7	1	1	0	0	0	2	0	1	0	0	0	0	0	0	0	30.6	3.15	3
445	77	1	33	5	1	165	60	157	97	76	1	0	1	0	0	0	0	0	0	0	0	0	0	0	0	0	0	0.79	72.2	13.9	164.4	0	1	0	0	0	1	1	1	0	0	0	0	0	0	0	7.44	1.61	1
446	62	1	33	5	1	166.3	66.8	171	97	120	1	1	1	0	0	0	0	1	0	0	1	1	0	1	0	1	0	1.82	30.8	12.9	436.2	0	2	1	0	0	3	0	3	1	0	0	0	1	2	0	46.08	1.6	2
447	68	1	34	5	1	163	65	142	72	94	1	1	1	0	0	0	0	1	0	0	0	0	0	0	0	0	0	0.82	71.8	14.1	291.5		1	0	0	0	2	0	3	1	0	0	0	0	0	0	19.04	3.12	2
448	63	0	34	5	1	158	60	140	86	60	1	0	1	0	0	0	0	0	0	0	0	0	0	0	0	0	0	0.51	82.3	11.7	55.6	0	1	0	0	0	3	0	3	1	0	0	0	0	0	0	4.25	2.5	1
449	44	1	34	5	1	175	96	130	95	100	0	1	0	0	0	0	0	0									0	0.79	84.7	15.4	5.1	0	3	1	1	0	1	1	1	0	0	0	0	0	0	0	32.37	1.96	2
450	69	0	34	5	1	158	53	98	58	42	0	0	1	0	0	0	0	0	0	0	1	0	0	0	0	0	0	0.61	73	13.1	116.4	0	1	0	0	0	1	1	1	0	0	0	0	1	0	0	11.32	2.74	1
451	60	1	34	5	1	159	64	156	95	86	1	1	1	0	0	0	0	0	1	0	1	0	0	1	0	1	1	0.88	68.9	15.9	4.2	0	1	0	0	0	1	1	1	0	0	0	0	1	3	1	15.55	2.59	2
452	77	1	35	5	1	158	65	121	69	48	1	0	0	0	0	0	0	0	0	0	0	1	0	1	0	0	0	1.44	37.4	14.6	36.1	0	1	0	0	0	2	0	3	1	0	0	0	0	0	0	30.29	2.65	2
453	87	0	35	5	1	140	40	134	68	83	0	0	1	0	0	0	0	0	0	0	0	0	0	0	0	0	0	0.65	63.7	10	690.8		1	0	0	0	2	0	3	1	0	0	0	0	0	0	19.06	2.38	2
454	65	1	35	5	1	178	83	176	97	76	1	1	0	0	0	0	0	0	0	0	0	0	1	1	0	0	1	0.86	69	16	130.4	0	1	0	0	0	3	0	3	1	0	0	0	1	1	0	46.55	3.05	2
455	54	1	35	5	1	169	82	144	100	80	0	1	1	0	0	0	0	1	0	0	0	0	0	0	0	0	0	0.57	114.2	15.6	165.4	1	1	0	0	0	2	0	1	0	0	0	0	0	0	0	15.37	2.6	2
456	78	0	35	5	1	149	52	128	58	43	1	0	0	0	0	0	0	0	0	0	0	0	0	0	0	0	0	0.75	56.2	11.6	1262.4	0	1	0	0	0	2	0	2	0	0	0	0	0	0	0	13.52	2.09	1
457	55	1	35	5	1	169	65	132	96	156	1	1	1	1	1	0	0	0	1	1	1	0	1	0	1	1	0	10.98	405	11.5	2022.7	0	3	1	1	1	2	0	1	0	0	0	0	0	0	0	20.77	3.23	2
458	65	0	36	5	1	149	54	96	70	102	1	1	1	1	0	0	0	1	0	0	0	0	0	0	1	0	0	9.76	3.6	11.2		0	1	0	0	0	1	1	1	0	0	0	0	0	1	0	8.07	2.95	1
459	46	1	36	5	1	165	75	156	102	104	0	0	0	0	0	0	0	1	0	0	0	1	1	1	0	0	0	2.03	28.3	17	4	0	1	0	0	0	1	1	2	0	0	0	0	0	2	0	11.41	2.09	2
460	81	1	36	5	1	158	59.6	98	60	123	1	0	0	0	0	0	0	0	0	0	0	1	0	1	0	0	0	1.15	47.2	11.6	469	0	2	1	0	0	2	0	3	1	1	0	0	0	0	0	15.05	2.93	3
461	28	1	36	5	1	177	98.2	122	71	68	0	0	0	0	0	0	0	1										0.97	77.1	13.3	4	0	1	0	0	0	2	0	1	0	0	0	0	0	0	0	28.63	3.45	2
462	80	1	36	5	1	159	53	238	78	85	1	1	1	1	1	0	0	0	1	1	1	1	1	1	0	1	0	7.64	6	11.8	474.4	0	1	0	0	0	1	1	1	0	0	0	0	1	2	0	10.75	2.48	2
463	76	1	36	5	1	153	50	124	58	36	1	0	0	0	0	0	0	0	0	0	0	0	0	1	0	0	0	0.87	65.2	12.5	87.3	0	1	0	0	0	2	0	1	0	0	0	0	0	2	0	13.73	2.63	2
464	70	1	36	5	1	173	75	150	93	99	1	0	0	0	0	0	0	1	0	0	0	1	0	1	0	0	0	0.68	87.4	15.2	81.7	0	1	0	0	0	1	1	1	0	1	1	0	1	3	1	29.01	3.87	1
465	49	1	36	5	1	170	53				1	1	0	1	0	0	0	0	0	0	0	1	0	0	0	1	0	4.52	12.2	10		0	3	1	0	1	2	0	3	1	0	0	0	0	3	1	68.3	3.64	3
466	56	1	37	5	1	176	93	184	100	90	1	1	1	0	0	0	0	1	1	1	0	0	0	0	0	0	0	0.92	66.9	14.2	354.7	0	1	0	0	0	1	1	3	1	0	0	0	1	0	0	22.86	4.42	1
467	78	1	37	5	1	170	73.9	120	64	78	1	1	1	0	0	0	0	0	0	0	1	1	0	0	0	1	0	1.63	32.6	14.6	1172.5	0	1	0	0	0	1	1	3	1	1	1	0	1	3	1	22.57	2.06	2
468	85	0	37	5	1	153	54	128	78	86	1	0	1	0	0	0	0	0	0	0	1	1	0	0	0	0	0	0.97	41.4	12.6	51	0	1	0	0	0	2	0	1	0	0	0	0	0	0	0	20.79	2.31	3
469	67	1	37	5	1	167	61	134	87	90	1	1	1	0	0	0	0	1	0	0	0	1	0	1	0	0	0	0.81	73.1	10.6	169.3		1	0	0	0	1	1	2	0	0	0	0	0	3	1	28.57	2.56	2
470	74	1	37	5	1	174	61	169	93	99	1	0	1	1	0	0	0	0	0	0	0	1	1	0	1	0	0	6.76	7	13	1754.6	0	1	0	0	0	1	1	2	0	0	0	1	0	3	1	9.04	2.56	3
471	69	1	37	5	1	171	79	122	89	62	1	0	0	0	0	0	0	0	0	0	0	1	0	0	0	0	0	0.83	70.6	15.1	29.2	0	1	0	0	0	1	1	3	1	0	0	0	0	0	0	19.99	2.29	2
472	78	0	38	5	1	150	63			89	1	0	1	0	1	0	1	0	0	0	0	0	0	1	0	0	0	0.72	75.9	12.2		0	1	0	0	0	1	1	2	0	0	0	0	1	2	0	32.12	2.57	3
473	56	1	38	5	1	173	92			74	1	1	1	0	0	0	0	1	0	0	0	1	0	1	0	1	0	1.08	56.2	16.7	54.8	1	1	0	0	0	2	0	1	0	0	0	0	0	0	0	54.83	1.81	3
474	48	1	38	5	1	185	80	112	86	98	0	0	0	0	0	0	0	1										0.98	48	12.7	81.4	0	3	1	1	1	2	0	1	0	0	0	0	0	0	0	13.24	3.96	2
475	59	1	39	5	1	171	79.1	122	86	70	1	0	1	0	0	0	0	0	0	0	0	1	0	0	0	0	0	1	60.2	15	29.1		1	0	0	0	1	1	1	0	0	0	0	0	0	0	26.89	1.5	2
476	54	1	39	5	1	168	74			57	0	1	1	0	0	0	0	1	0	0	0	0	0	0	0	1	1	0.59	110	14.7	66.2	0	1	0	0	0	2	0	2	0	0	0	0	1	0	0	9.54	3.64	1
477	82	1	39	5	1	162	63	138	69	72	0	0	0	0	0	0	0	0	0	0	0	0	0	0	0	0	0	0.76	82.2	13	643	0	1	0	0	0	2	0	2	0	0	0	0	0	0	0	16.59	1.77	1
478	95	1	39	5	1	158	66.4	120	85	83	1	0	0	0	0	0	0	0	0	0	0	0	0	0	1	0	0	1.22	42.2	16.3	31.3	0	1	0	0	1	1	1	2	0	0	0	0	1	3	1	36.52	2.31	2
479	92	1	39	5	1	160	40	122	58	68	1	1	0	0	1	0	0	0	1	0	0	1	1	1	0	0	0	0.63	87.8	12.4	438.8	0	1	0	0	0	1	1	3	1	0	0	0	0	3	1	29.4	2.74	2
480	68	1	40	5	1	163	73.5	85	63	60	1	1	1	0	1	0	1	0	1	0	0	1	1	0	1	1	0	0.94	61.8	13.2	727.6	0	3	1	0	1	1	1	3	1	0	0	1	0	0	0	28.82	2.12	1
481	80	0	40	5	1	138	38.7	70		114	1	1	1	0	0	1	0	0										1.01	40.3	9.2	1359.4	0	3	1	1	1	2	0	3	1	0	0	0	0	2	0	39.64	1.57	3
482	69	1	40	5	1	163	51.3	100	70	58	1	0	0	0	0	0	0	0	0	0	0	1	0	1	0	0	0	1.01	56.9	10.6	10.2	0	1	0	0	0	2	0	1	0	0	0	0	1	0	0	32.56	4.27	2
483	81	0	40	5	1						0			0	0	0	0											0.67	62.9	11.1		0	3	1	1	1	1	1	1	0	1	1	0	1	2	0	4.86	2.59	1
484	88	1	40	5	1	155	42.4	137	67	87	1	1		0	0	0	0	0	1	0	1	1	0	1	0	0	1	1.53	33.7	10.6	1611.3	0	2	1	0	0	1	1	3	1	1	0	0	0	2	0	8.95	2.39	2
485	65	1	40	5	1	165	60	92	71	137	0	1	0	0	0	0	0	0	0	0	0	0	0	0	0	0	0	0.82	72.7	11.7	161.1	0	3	1	1	1	1	1	3	1	0	0	0	0	1	0	21.2	2.16	1
486	58	1	41	5	1	167	72.3	123	81	51	1	0	1	0	0	0	0	0	0	0	0	0	0	0	0	0	0	0.7	89.4	12.2	13.1	0	1	0	0	1	2	0	2	0	0	0	0	0	1	0	35.1	3.33	3
487	85	0	41	5	1	155	50	112	86	80	0	0	0	0	0	0	0	0	0	0	0	0	0	0	0	0	0	0.75	54.9	8.5	1315.4	0	1	0	0	0	2	0	2	0	0	0	0	0	0	0	12.8	2.39	2
488	74	1	42	5	1	164	64.2	154	93	59	1	0	1	0	0	0	0	0	0	0	0	1	0	1	0	0	0	0.7	76.2	16.3	189.8	0	1	0	0	0	1	1	3	1	0	0	0	0	0	0	21.91	1.78	2
489	56	1	42	5	1	177	81.8	112	80	102	0	1	0	0	0	0	0	1	0	0	0	0	0	0	0	1	1	0.75	83.7	13.6	174.8	0	1	0	0	0	1	1	3	1	0	0	0	0	3	1	25.51	1.76	1
490	74	1	42	5	1	167.3	80.2	116	72	78	1	0	1	0	0	0	0	1	1	0	0	1	0	0	0	0	0	3.16	16	11.4	68.7	0	1	0	0	0	2	0	1	0	0	0	0	0	0	0	15.32	3.19	1
491	31	1	42	5	1	174	85	151	111	120	1	0	0	0	0	0	0	1	0	0	0	0	0	0	0	0	0	0.47	165.4	13.8	119.8	0	1	0	0	0	1	1	1	0	0	0	1	1	0	0	12.26	2.65	1
492	56	1	42	5	1	176	89	124	75	92	0	1	0	0	0	0	0	1	1	0	0	0	0	0	0	0	0	1.4	42.3	13	878.2	1	1	0	0	0	2	0	3	1	1	0	0	1	0	0	50.48	2.62	1
493	78	1	43	5	1	163	62	190	87	75	1	1	1	0	0	0	0	1	0	0	1	1	0	0	0	1	0	0.85	66.4	13.7	338.3	1	1	0	0	0	1	1	1	0	0	0	0	0	1	0	31.54	1.85	2
494	58	0	43	5	1	153	44.9	148	85	72	1	0	1	0	0	0	0	1	0	0	0	0	0	0	0	0	0	0.72	64	13.1	81.4		1	0	0	0	2	0	1	0	0	0	0	0	3	1	25.97	2.47	2
495	71	1	43	5	1	165	65	118	82	130	0	0	0	0	0	0	0	1										0.99	47.6	14.4	65.1	0	3	1	1	1	3	0	3	1	1	1	0	1	1	0	6.63	2.45	3
496	72	1	43	5	1	166	56	164	77	66	1	0	0	0	0	0	0	0	0	0	0	1	0	0	0	0	0	0.82	70.6	13.5	136.9	0	1	0	0	0	1	1	2	0	0	0	0	0	2	0	8.34	2.44	1
497	90	0	44	5	1	150	53	150	81	67	1	0	1	0	0	0	0	0	0	0	0	1	0	1	0	0	0	1.13	34.5	12.1	73.5	0	1	0	0	0	1	1	1	0	0	0	0	0	0	0	11.77	1.55	1
498	54	1	44	5	1	165	64	195	129	95	1	0	1	0	0	0	0	0	0	0	0	0	0	0	0	0	0	0.87	71.9	16.9		0	1	0	0	0	1	1	2	0	0	0	0	1	1	0	16.08	2.17	2
499	58	1	44	5	1	168	65.5	50	29	139	1	0	0	0	1	0	1	1										8.42	5.9	16.5		0	3	1	1	1	2	0	3	1	0	0	0	1	0	0	22.83	2.35	2
500	83	1	44	5	1	164	61	131	100	47	1	1	1	0	0	0	0		0	0	0	1	0	0	0	0	0	3.57	13.6	15.4	979.4	0	3	1	0	0	2	0	1	0	0	0	0	0	0	0	8.91	2.41	2
501	87	1	44	5	1	156.5	63	163	71	62	1	1	1	0	0	0	0	0	0	1	1	1	0	0	0	1	0	1.19	44.5	12.6	131.6	0	1	0	0	0	2	0	2	0	0	0	0	0	3	1	9.57	2.49	1
502	77	0	45	5	1	152	50	154	68	60	1	1	1	0	0	0	0	0	0	0	1	0	0	1	0	0	0	0.29	50.5	12.3	128.2	0	1	0	0	0	3	0	1	0	0	0	0	0	3	1	9.65	2.84	2
503	73	1	45	5	1	158	48.8			90	1	1	1	0	0	0	0	0	0	1	0	0	1	1	1	0	0	0.82	84.7	14.9	907.4	0	1	0	0	0	1	1	3	1	0	0	0	0	3	1	7.38	3.23	1
504	74	1	45	5	1	168	60	223	96	88	1	0	0	0	0	0	0	1	0	0	0	1	0	1	0	0	0	0.58	102.4	14.4	207.8	0	1	0	0	0	1	1	2	0	0	0	0	0	0	0	14.95	1.05	1
505	53	1	45	5	1	177	75.1	111	81	59	1	1	1	0	1	0	1	1	0	1	1	0	1	1	0	1	0	0.61	106.6	16.9	6.9	0	1	0	0	0	3	0	1	0	0	0	0	0	0	0	29.03	3.03	2
506	68	1	45	5	1	163	71.3	130	97	51	0	0	1	0	0	0	0	1	0	0	0	0	0	0	0	0	0	0.79	74.8	15	22.1	0	1	0	0	0	1	1	1	0	0	0	1	0	0	0	6.67	1.39	1
507	87	1	46	5	1	155.2	59	137	65	80	1	1	1	0	1	1	1	0	1	0	1	0	1	1	1	1	0	2.56	19.3	10.7	2522.3		1	0	0	0	3	0	3	1	1	0	1	0	0	0	27.28	1.96	1
508	45	1	46	5	1	187.5	83	162	103	97	1	0	1	0	0	0	0	1	0	0	0	0	0	0	0	0	0	0.76	87.8	15.5	87	0	1	0	0	0	1	1	1	0	0	0	0	1	0	0	18.83	4.03	2
509	77	1	47	5	1	156	58	167	71	61	1	1	1	0	0	0	0	0	0	0	1	0	1	0	0	1	0	0.79	72.2	14.6	84.2		1	0	0	0	1	1	1	0	0	0	0	0	3	1	38.53	2.77	3
510	77	0	47	5	1	147	47.2	104	48	44	1	1	0	0	0	0	0	0	0	0	0	0	0	0	0	1	0	0.81	51.9	13.2	67.2	0	1	0	0	0	2	0	3	1	0	0	0	0	2	0	31.17	1.76	2
511	75	1	47	5	1	164	71	162	98	72	1	0	0	0	0	0	0	0	0	0	0	0	0	0	0	0	0	1.1	50.6	13.7	198.6	1	1	0	0	0	1	1	1	0	0	0	0	1	0	0	49.02	2.24	3
512	82	1	49	5	1	156	53	110	68	117	1	1	0	0	0	0	0	0	0	0	0	1	0	1	0	1	0	1.62	32.3	12.7	2374.3		2	1	0	0	1	1	2	0	0	0	1	0	0	0	31.6	2.03	2
513	65	1	50	5	1	167	78.5	136	86	73	1	1	0	0	0	0	0	1	0	0	0	0	0	0	0	1	0	0.8	60.5	14.2	41.9	0	3	1	0	0	2	0	3	1	0	0	0	0	0	0	7.05	3.32	3
514	79	0	50	5	1	160	46	188	90	120	1	1	0	0	0	0	0	0	0	0	0	1	0	0	1	1	1	0.75	56	9.3	1033	1	2	1	0	0	1	1	3	1	0	0	0	0	0	0	40.22	1.42	1
515	57	1	50	5	1	178	73	86	67	64	0	0	0	0	0	0	0	0	0	0	0	0	0	0	0	0	0	1.25	47.6	13.5	12.5	0	3	1	0	1	2	0	2	0	0	0	0	0	0	0	9.74	3.1	1
516	64	0	51	5	1	156	47	221	121	98	1	1	0	0	0	0	0	0	0	0	0	0	1	0	1	1	0	0.79	62.3	12.8	469	0	1	0	0	0	1	1	2	0	1	0	0	0	1	0	34.65	1.13	2
517	68	1	51	5	1	165	77	190	100	114	1	1	1	1	1	1	1	0	1	1	1	1	1	1	0	1	0	9.96	4.7	10.9	916.2	0	1	0	0	0	3	0	1	0	0	0	0	0	0	0	12.72	2.31	2
518	67	1	53	5	1	177.5	55.6	159	113	60	0	0	0	0	0	0	0	1	0	0	0	0	0	0	0	0	0	1.42	40.8	13		0	1	0	0	0	3	0	3	1	1	1	0	1	2	0	31.31	3.93	2
519	91	1	54	5	1	150	68	130	59	35	0	1	0	0	0	0	0	0	0	0	0	0	0	0	0	1	0	1.12	47	9.8	336.3	1	1	0	0	0	2	0	2	0	0	0	0	0	0	0	27.49	3.03	3
520	59	1	55	5	1	164	65	196	106	85	1	0	1	0	0	0	0	0	0	0	0	0	0	0	0	0	0	0.74	83.7	13.5	41.4	0	1	0	0	0	3	0	3	1	0	0	0	0	2	0	25.8	3.16	3
521	82	0	55	5	1	140		123	65	117	0	1	0	0	0	0	0	0	0	0	0	0	0	0	0	0	0	0.76	54.6	8.6			1	0	0	0	1	1	1	0	0	0	0	0	0	0	24.57	1.47	2
522	52	1	55	5	1	170	85.5	170	107	75	1	1	1	0	1	0	1	0	1	0	1	1	1	1	0	1	0	0.61	107.2	17.5	7	0	1	0	0	0	2	0	2	0	1	0	0	1	0	0	20.07	3.45	2
523	88	0	56	5	1	139	39	100	38	54	1	0	0	0	0	0	0	0	0	0	0	1	0	1	0	0	0	0.75	54.3	10.5	149.8	0	1	0	0	0	2	0	1	0	0	0	0	1	2	0	11.17	3.19	1
524	68	1	56	5	1	167.5	64.7	83	51	105	1	1	1	0	1	0	1	1	1	0	1	0	0	0	0	0	0	0.75	79.2	7.7	86.5	0	3	1	0	1	2	0	3	1	0	0	0	0	3	1	21.55	3.51	2
525	75	1	58	5	1	162	58	94	62	76	1	1	0	0	0	0	0	0	0	0	0	0	0	1	0	1	0	1.48	36.6	11.9	324.8	0	3	1	1	1	2	0	3	1	1	0	0	0	0	0	19.78	1.73	1
526	74	1	59	5	1	167	66	186	94	96	1	1	1	0	1	0	0	1	1	0	1	0	0	1	0	1	0	0.62	128.8	15.8	7.2	0	1	0	0	0	1	1	1	0	0	0	0	0	0	0	11.23	2.54	2
527	77	0	59	5	1	142.8	41.2	47	31	54	1	1	1	0	0	0	0	0										0.81	51.9	12.9	317.9	0	3	1	1	1	1	1	3	1	1	1	0	1	0	0	9.5	1.62	3
528	65	1	61	5	1	168	70	216	133	144	1	1	1	0	0	0	0	0	1	0	0	1	1	1	0	1	0	0.52	119.7	14.2	792	0	2	1	0	0	3	0	3	1	0	0	0	0	1	0	27.81	1.52	1
529	80	1	63	5	1	170	70	69	39	92	1		1	0		0		1	0	1	1	1	0	1	0	0	0	1.13	41	11.9		0	3	1	1	1	1	1	2	0	1	0	0	0	3	1	8.45	1.82	2
530	59	1	64	5	1	173	76.7	159	100		1	1	1	0	0	0	0	0	1	0	0	0	0	0	0	0	0	1.43	40.7	11.4	504.4		1	0	0	0	2	0	3	1	0	0	1	0	2	0	71	1.57	3
531	51	1	66	5	1	168	61.5	124	70	129	0	1	1	0	0	0	0	0	0	0	0	0	0	0	0	0	0	0.6	109.8	16.7	8.4	0	1	0	0	0	2	0	3	1	0	0	0	0	3	1	6.32	3.14	3
532	37	1	67	5	1	174	87.2	166	116	95	1	0	0	1	0	0	0	0	0	0	0	1	0	0	0	0	0	10.36	5.3	12.2	45.9	0	2	1	0	0	1	1	2	0	0	0	1	0	2	0	14.74	3.37	1
533	73	1	67	5	1	161	58	179	141	110	1	0	1	0	1	0	0	0	0	0	1	0	0	0	0	0	0	0.77	75.4	15.9	300	0	2	1	1	0	1	1	2	0	0	0	0	0	0	0	26.61	1.95	2
534	68	1	74	5	1	158	70	87	56	110	1	1	1	0	0	0	0	0	0	0	1	1	0	1	0	1	0	3.17	16.4	11.4	3255.1		3	1	0	1	1	1	3	1	1	1	0	1	3	1	48.43	3.57	2
535	86	1	75	5	1	165	75	69	53	64	1	0	0	0	0	0	0	0	0	0	0	1	0	1	0	0	0	1.4	37.4	8.6	502.5	0	3	1	1	1	1	1	2	0	0	0	0	1	0	0	11.6	1.94	2
536	86	1	77	5	1	162	53	192	92	99	1	1	1	0	0	0	0	0										1.33	39.5	12.8	1259.8	0	2	1	0	0	1	1	3	1	0	0	0	0	3	1	24.93	1.7	3
537	58	1	79	5	1	170.5	74.3	117	86	67	1	0	0	0	0	0	0	0	0	0	0	0	0	1	0	0	0	0.73	85.4	14.4	8.2	0	1	0	0	0	2	0	1	0	0	0	0	1	1	0	25.36	4.79	2
538	63	0	86	5	1	153	47.7	112	97	95	1	0	1	1	0	0	0	0	0	1	0	0	1	0	0	0	0	9.46	4.8	11.8	1250.2	0	1	0	0	0	2	0	3	1	0	0	0	0	1	0	27.62	3.44	3
539	85	1	92	5	1	155	53	143	91	89	1	1	0	0	0	0	0	0	1	0	0	1	0	1	0	1	0	1.56	33.3	10.7	548.5	0	3	1	1	1	1	1	2	0	1	1	0	1	2	0	7.83	1.97	2
[truncated: 32 more columns]
